# Supplementary material for: La–[18/19F]fluoride complexes: a novel addition to the radiofluorination family
Source: Royal Society of Chemistry journal article supplement (doi:10.1039/d5dt02645h), 2026-03-30
Supplement: d5dt02645h1.pdf [file d5dt02645h1.pdf]

## Supporting Information

# La- $^{18/19}\text{F}$ fluoride complexes: a novel addition to the radiofluorination family.

*Martin Behe, Stefan Gruber, Cen Li, Georg Schreckenbach, Linjing Mu, Margret Schottelius, and Radmila Faizova\**

## 1 Table of Contents

|                                                                                                           |           |
|-----------------------------------------------------------------------------------------------------------|-----------|
| 1 Table of Contents .....                                                                                 | 1         |
| 2 Materials and Instruments .....                                                                         | 2         |
| 2.1 [La(L)] and [La(L)F] synthesis and characterization.....                                              | 3         |
| $^{19}\text{F}$ -Fluorination of $[\text{La}(\text{NO}_3)_3(\text{H}_2\text{O})_6]$ .....                 | 3         |
| Synthesis and $^{19}\text{F}$ -fluorination of $[\text{La}(\text{DOTA})]^-$ in MeOH.....                  | 3         |
| Synthesis and $^{19}\text{F}$ -fluorination of $[\text{La}(\text{HDOTA})]$ in aqueous buffer.....         | 4         |
| Synthesis and $^{19}\text{F}$ -fluorination of $[\text{La}(\text{macropa})]^+$ in MeOH.....               | 5         |
| Synthesis and $^{19}\text{F}$ -fluorination of $[\text{La}(\text{macropa})]^+$ in aqueous buffer. ....    | 6         |
| Synthesis and $^{19}\text{F}$ -fluorination of $[\text{La}(\text{DOTAM})]^{3+}$ in MeOH. ....             | 7         |
| Synthesis and $^{19}\text{F}$ -fluorination of $[\text{La}(\text{DOTAM})]^{3+}$ in aqueous buffer. ....   | 8         |
| Synthesis and $^{19}\text{F}$ -fluorination of $[\text{La}(\text{DOTpy})(\text{OTf})]^{2+}$ in MeOH. .... | 9         |
| Water stability of $[\text{LaF}(\text{DOTpy})]\text{OTf}_2$ (8).....                                      | 11        |
| 2.2 $^{18}\text{F}$ -fluorination .....                                                                   | 13        |
| Stability of $[\text{LaF}(\text{DOTpy})]\text{OTf}_2$ under different conditions.....                     | 13        |
| $^{18}\text{F}$ -fluorination via $\text{La}[^{18}\text{F}]\text{F}$ intermediate.....                    | 14        |
| 2.2 Computational Methods.....                                                                            | 15        |
| 2.3 X-ray crystallography .....                                                                           | 41        |
| <b>3 References:</b> .....                                                                                | <b>42</b> |

## 2 Materials and Instruments

All solvents and reagents, unless otherwise noted, were purchased from commercial sources and used as received without further purification.

### Chemicals:

DOTpy (1,4,7,10-tetrakis(2-pyridylmethyl)-1,4,7,10-tetraazacyclododecane) ligand was synthesized according to a previously published procedure.<sup>[1]</sup>

NMR spectra were recorded at ambient temperature on a 400 MHz (<sup>1</sup>H) and 376 MHz (<sup>19</sup>F) spectrometer, chemical shifts are reported in ppm. <sup>1</sup>H NMR spectra were referenced to the residual solvent peak. <sup>19</sup>F NMR spectra were referenced to a triflate  $\delta = -80$  ppm.

Compounds were analyzed by LCMS (Bruker Amazon1 LCMS-system connected to Agilent 1290 infinity II).

For radio-HPLC, a Dionex with a C-23 reversed-phase column (120 BS-C23, 5  $\mu$ m, 150  $\times$  4.6 mm) and a radiodetector (Berthold, HPLC Radioflow Detector, LB 509); or Agilent 1200 instrument equipped with a Phenomenex Luna C18 reverse phase column (100  $\times$  4.6 mm, 5  $\mu$ m) and a GABI star radioactive HPLC flow monitor (Elysia-ray test GmbH) was employed.

Gradient HPLC methods were employed using a binary mobile phase that contained H<sub>2</sub>O + 0.1 % TFA (A) and MeOH (B): HPLC Method 1: flow rate of 1 mL/min; 0-90% B (0–10 min), 90% B (10–12 min), 90-0% B (14 min), 0% (14–15 min).

For Method 2, gradient HPLC methods with binary mobile phase that contained H<sub>2</sub>O (A) and MeOH (B): HPLC Method 2: flow rate of 1 mL/min; 5-30% B (0–10 min), 30-60% B (10–15 min), 60-95% B (15–17 min), 95% (17–18 min), 5% (18–20 min).

[<sup>18</sup>F]fluoride was obtained by bombardment of 98% enriched (<sup>18</sup>O) water via the <sup>18</sup>O(p,n)<sup>18</sup>F nuclear reaction in a Cyclone 18/9 cyclotron (18-MeV; IBA). [<sup>18</sup>F]BnEt<sub>3</sub>NF in MeOH was prepared by passing the [<sup>18</sup>F]fluoride target water through a pre-conditioned QMA Carbonate Plus Light cartridge, followed by a 1 mL wash with the corresponding solvent. [<sup>18</sup>F]BnEt<sub>3</sub>NF was then eluted with 1 mL of a 30 mM BnEt<sub>3</sub>NCl solution in MeOH.

## 2.1 [La(L)] and [La(L)F] synthesis and characterization

### <sup>19</sup>F-Fluorination of [La(NO<sub>3</sub>)<sub>3</sub>(H<sub>2</sub>O)<sub>6</sub>]

A colourless solution of lanthanum nitrate (10.0 mg, 0.023 mmol, 1 equiv.) in water was treated with a colourless solution of either KF (1.5 mg, 0.025 mmol, 1.1 equiv.), CsF (10.2 mg, 0.025 mmol, 1.1 equiv.), or TBAF (7.9 mg, 0.025 mmol, 1.1 equiv.). Immediate precipitation occurred, indicative of LaF<sub>3</sub> formation. <sup>19</sup>F NMR spectra demonstrated disappearance of fluoride from the solution, characteristic of precipitated LaF<sub>3</sub> (Figure S1).

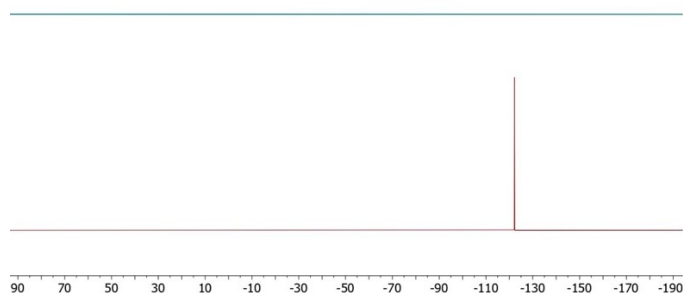

**Figure S1.** <sup>19</sup>F NMR spectrum (376 MHz, D<sub>2</sub>O, 298 K) of KF (bottom); the reaction mixture after the addition of KF to [La(NO<sub>3</sub>)<sub>3</sub>(H<sub>2</sub>O)<sub>6</sub>] (top).

### Synthesis and <sup>19</sup>F-fluorination of [La(DOTA)]<sup>-</sup> in MeOH.

H<sub>4</sub>DOTA (11.4 mg, 0.028 mmol, 1.1 equiv.) was suspended in methanol (0.5 mL), and triethylamine (4.4 equiv.) was added dropwise to yield a colourless solution. A solution of lanthanum triflate (15.0 mg, 0.026 mmol, 1 equiv.) in methanol (0.5 mL) was then added dropwise, and the mixture was stirred at 60 °C for 12 hours. After cooling to room temperature, tetrabutylammonium fluoride (TBAF, 8.2 mg, 0.026 mmol, 1 equiv.) was added, and the reaction mixture was analyzed by <sup>19</sup>F NMR, which showed a resonance at  $\delta = -144.8$  ppm attributed to free fluoride. After stirring for 30 minutes, a second equivalent of TBAF (8.2 mg, 0.026 mmol, 1 equiv.) was added, and the mixture was stirred for an additional 30 minutes. <sup>19</sup>F NMR and mass spectrometry analysis confirmed the absence of fluorinated species.

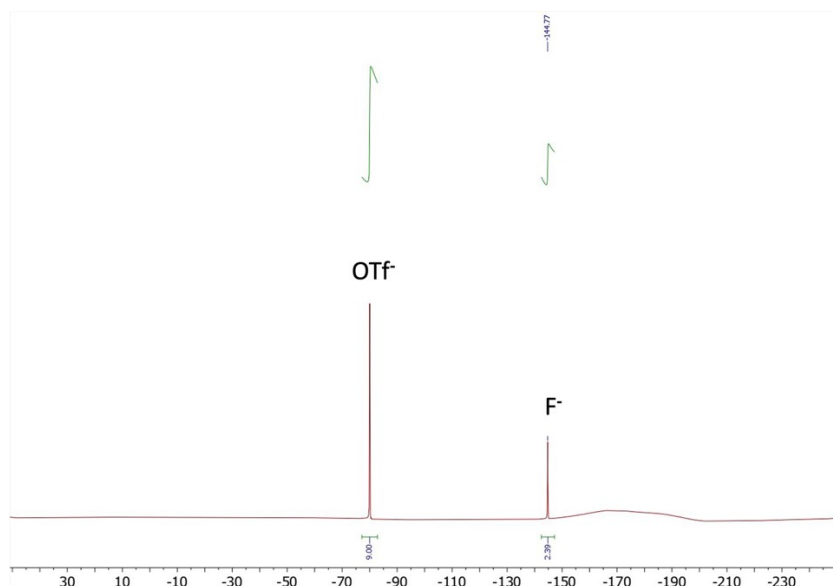

**Figure S2.**  $^{19}\text{F}$  NMR spectrum (376 MHz, MeOD/MeOH, 298 K) after the addition of 2 equiv. of TBAF to  $[\text{La}(\text{DOTA})]^-$ .

#### Synthesis and $^{19}\text{F}$ -fluorination of $[\text{La}(\text{HDOTA})]$ in aqueous buffer.

A colourless solution of lanthanum triflate (32.3 mg, 0.055 mmol, 1 equiv.) in  $\text{NH}_4\text{OAc}$  (pH=5; 2.0 mL) was added dropwise to a colourless solution of  $\text{H}_4\text{DOTA}$  (22.2 mg, 0.055 mmol, 1 equiv.) in  $\text{NH}_4\text{OAc}$  (pH=5; 1.0 mL). The resulting solution was stirred for 20 hours at 80 °C.

TOF MS: Found  $m/z$  540.3, 558.08; Calculated for  $[\text{C}_{16}\text{H}_{25}\text{N}_4\text{O}_8\text{La}]^+$  ( $[\text{La}(\text{HDOTA})]^+$ ) and  $[\text{C}_{16}\text{H}_{27}\text{N}_4\text{O}_9\text{La}]^+$  ( $[\text{La}(\text{H}_2\text{O})(\text{HDOTA})]^+$ ), respectively: 540.3, 558.08.

To the reaction mixture a colourless solution of TBAF (120 mg, 0.38 mmol, 7 equiv.) in  $\text{NH}_4\text{OAc}$  (1.4 mL) was prepared and stepwise added to the solution of the complex at room temperature. The  $^{19}\text{F}$  NMR indicated only a resonance of free fluoride ( $\delta = -122$  ppm), even after the addition of 7 equiv. of TBAF (Figure S3). Mass spectrometry analysis of the reaction mixture revealed no detectable  $[\text{LaF}(\text{HDOTA})]^{2-}$  ion.

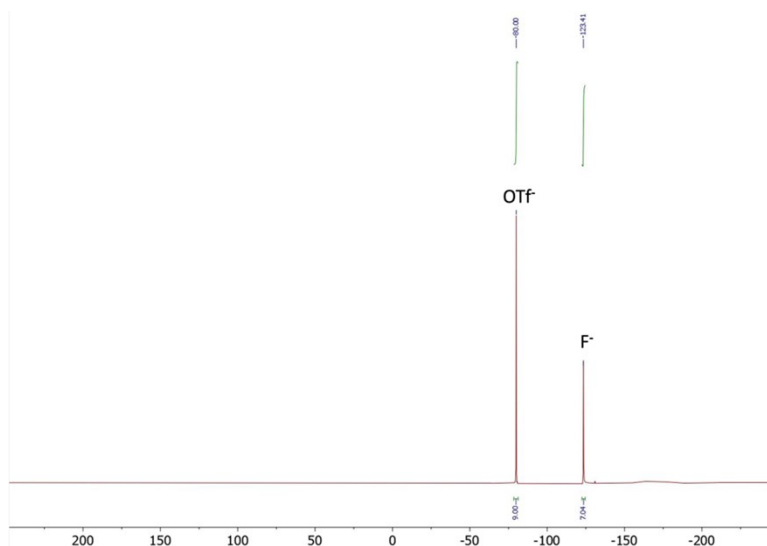

**Figure S3.**  $^{19}\text{F}$  NMR spectrum (376 MHz,  $\text{D}_2\text{O}/\text{H}_2\text{O}$ , 298 K) after the addition of 7 equiv. of TBAF to  $[\text{La}(\text{HDOTA})]$ .

#### Synthesis and $^{19}\text{F}$ -fluorination of $[\text{La}(\text{macropa})]^+$ in MeOH.

To a colourless suspension of  $\text{H}_2\text{macropa}$  (41.2 mg, 0.08 mmol, 1.1 equiv.) in methanol (1 mL), triethylamine (TEA, 2.2 equiv.) was added dropwise, resulting in a colourless solution. A colourless solution of lanthanum triflate (42.8 mg, 0.07 mmol, 1 equiv.) in methanol (0.5 mL) was added dropwise to the ligand solution. The resulting mixture was stirred for 1 hour at ambient temperature. LC-MS ( $m/z$ ): Found 669.2; Calculated for  $[\text{C}_{26}\text{H}_{34}\text{N}_4\text{O}_8\text{La}]^+$  669.14.

A colourless solution of TBAF (22.1 mg, 0.07 mmol, 1 equiv.) was added to the reaction mixture, and a  $^{19}\text{F}$  NMR spectrum was recorded. The spectrum showed a resonance corresponding to triflate ( $\delta = -80$  ppm), and a new resonance at  $\delta = -7$  ppm, assigned to La-bound fluoride.

Addition of further equivalents of TBAF led to the appearance of a free fluoride resonance in the  $^{19}\text{F}$  NMR spectrum (Figure 1, Figure S4).

Stability of the complex in methanol was monitored by  $^{19}\text{F}$  NMR over two weeks, revealing increasing formation of insoluble  $\text{LaF}_3$ . The stability of  $[\text{LaF}(\text{macropa})]$  in water was also evaluated: upon addition of 300  $\mu\text{L}$  (50% v/v) HEPES buffer (pH=7), the resonance assigned to the La–F bond completely disappeared (Figure S5).

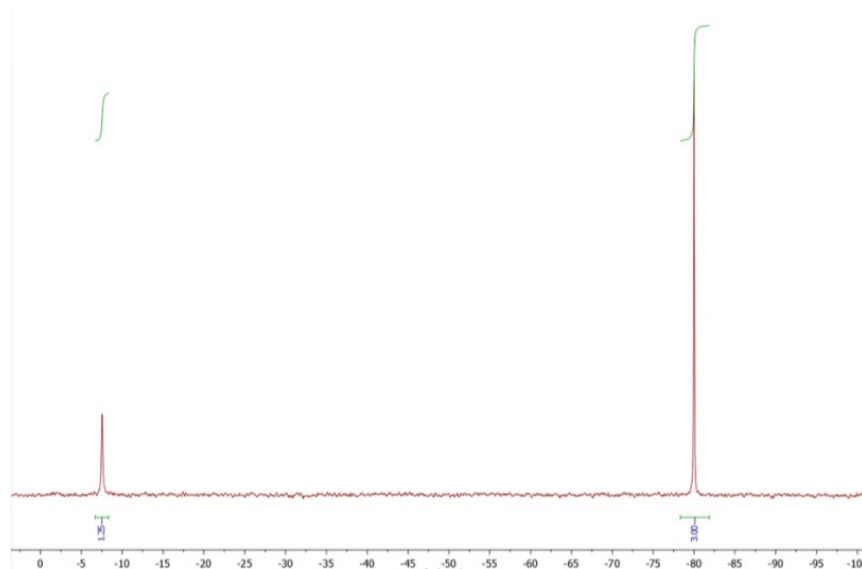

**Figure S4.**  $^{19}\text{F}$  NMR spectra (376 MHz, MeOD, 298 K) of  $[\text{LaF}(\text{macropa})]$  recorded immediately after the addition of 1 equiv. of TBAF to  $[\text{La}(\text{macropa})]\text{OTf}$  in MeOD.

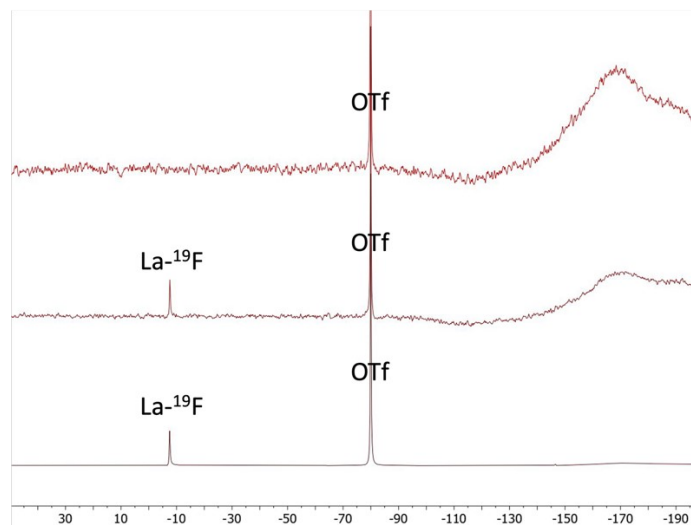

**Figure S5.**  $^{19}\text{F}$  NMR spectra (376 MHz, MeOH or MeOH/ $\text{H}_2\text{O}$ , 298 K) of *in situ* prepared  $[\text{LaF}(\text{macropa})]$  recorded immediately after the synthesis (bottom); 2 weeks after the synthesis (middle); and after the addition of 300  $\mu\text{L}$  (50% by volume) of aq. HEPES (pH=7).

#### **Synthesis and $^{19}\text{F}$ -fluorination of $[\text{La}(\text{macropa})]^+$ in aqueous buffer.**

A colourless solution of lanthanum triflate (12.2 mg, 0.02 mmol, 1 equiv.) in 0.25 M  $\text{NH}_4\text{OAc}$  (pH = 5; 1.0 mL) was added dropwise to a colourless solution of  $\text{H}_2\text{macropa}$  (11 mg, 0.02 mmol, 1.1 equiv.) in 0.25 M aqueous  $\text{NH}_4\text{OAc}$  (pH = 5; 0.5 mL). The resulting mixture was stirred for 1 hour at 60  $^\circ\text{C}$ . Subsequently, a colourless solution of TBAF (5.9 mg, 0.02 mmol, 1 equiv.) was added to the reaction mixture at room temperature and stirred overnight. The  $^{19}\text{F}$  NMR spectrum showed

resonances corresponding to free fluoride and triflate. Upon addition of a second equivalent of TBAF (5.9 mg, 0.02 mmol, 1 equiv.), a further  $^{19}\text{F}$  NMR spectrum was recorded, again only indicated free fluoride and triflate resonances.

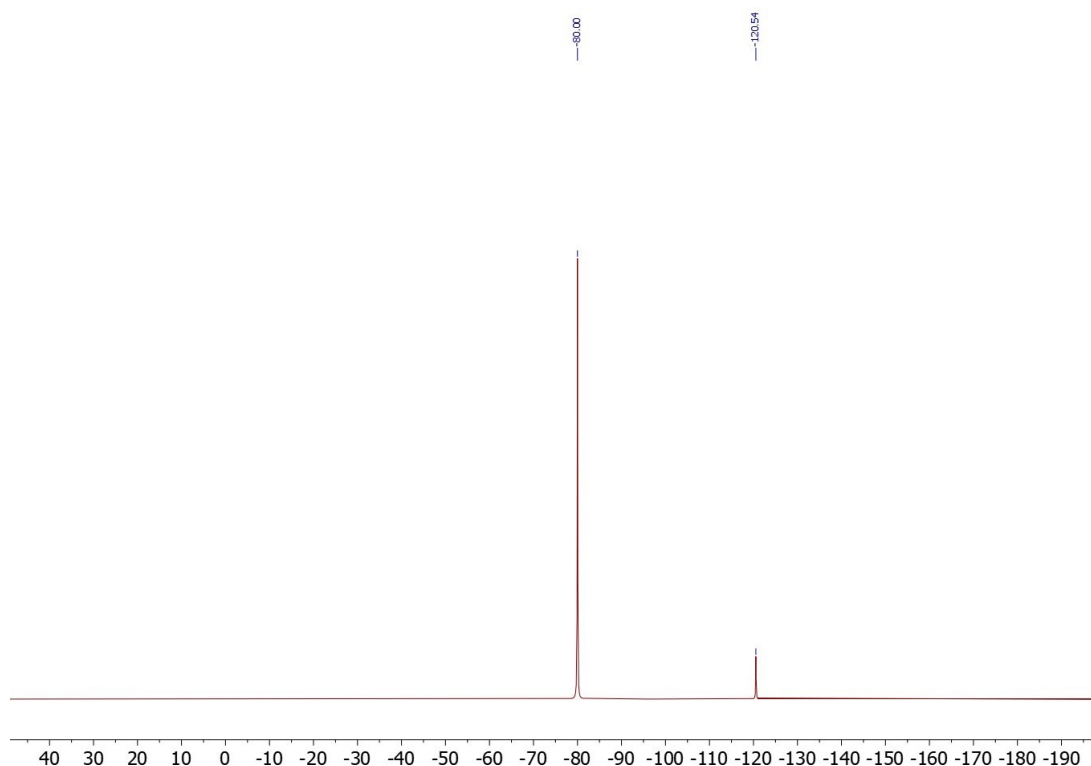

**Figure S6.**  $^{19}\text{F}$  NMR spectrum (376 MHz,  $\text{D}_2\text{O}$ , 298 K) after the addition of 2 equiv. of TBAF to  $[\text{La}(\text{macropa})]\text{OTf}$ .

#### Synthesis and $^{19}\text{F}$ -fluorination of $[\text{La}(\text{DOTAM})]^{3+}$ in MeOH.

To a colourless suspension of DOTAM (7.0 mg, 0.017 mmol, 1.1 equiv.) in MeOH (0.5 mL), a colourless solution of lanthanum triflate (9.4 mg, 0.016 mmol, 1 equiv.) in MeOH (0.5 mL) was added dropwise to the solution of the ligand. The resulting solution was stirred for 12 hours at 60 °C. LC-MS ( $m/z$ ): Found 270.65; Calculated for  $[\text{C}_{16}\text{H}_{32}\text{N}_8\text{O}_4\text{La}]^{2+}$  270.02

To the reaction mixture, a colourless solution of TBAF (5.4 mg, 0.017 mmol, 1.1 equiv.) in MeOH (0.5 mL) was added and a reaction mixture was stirred at room temperature for 2 hours. LC-MS ( $m/z$ ): Found 280.2; 559.6 Calculated for  $[\text{C}_{16}\text{H}_{32}\text{N}_8\text{O}_4\text{LaF}]^{2+}$  279.08; 558.16.  $^{19}\text{F}$  NMR spectrum was recorded, showing a resonance of triflate ( $\delta = -80$  ppm), a new resonance assigned to a La-F ( $\delta = -13.7$  ppm)(Figure S7). Further, precipitation was observed, suggesting the formation of  $\text{LaF}_3$ .

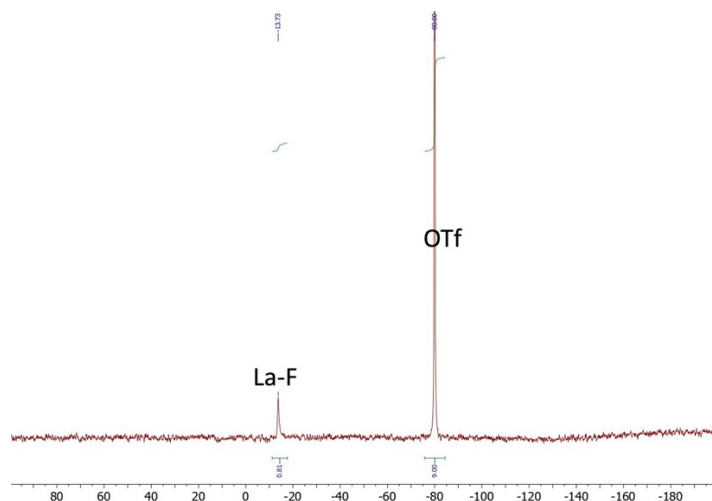

**Figure S7.**  $^{19}\text{F}$  NMR spectrum (376 MHz, MeOD, 298 K) after the addition of TBAF to  $[\text{La}(\text{DOTAM})]^{3+}$ .

#### Synthesis and $^{19}\text{F}$ -fluorination of $[\text{La}(\text{DOTAM})]^{3+}$ in aqueous buffer.

A colourless solution of lanthanum triflate (21.2 mg, 0.036 mmol, 1 equiv.) in 0.25 M  $\text{NH}_4\text{OAc}$  (pH=5; 0.5 mL) was added dropwise to a colourless solution of DOTAM (14.5 mg, 0.036 mmol, 1 equiv.) 0.25 M  $\text{NH}_4\text{OAc}$  (pH=5; 0.5 mL). The resulting solution was stirred for 12 hours at 80 °C. LC-MS ( $m/z$ ): Found 270.65; Calculated for  $[\text{C}_{16}\text{H}_{32}\text{N}_8\text{O}_4\text{La}]^{2+}$  270.02.

To the reaction mixture at ambient temperature, a colourless solution of TBAF (11.4 mg, 0.036 mmol, 1 equiv.) in 0.25 M  $\text{NH}_4\text{OAc}$  (pH=5; 0.5 mL) was added and left stirring for 1 hour at room temperature. Upon the addition of the TBAF solution, the formation of precipitate was observed.

A  $^{19}\text{F}$  NMR spectrum was recorded which indicated a broad resonance ( $\delta = -160$  ppm) and a new resonance ( $\delta = -20.5$  ppm) that was assigned to a “La–F” bond (Figure S8).

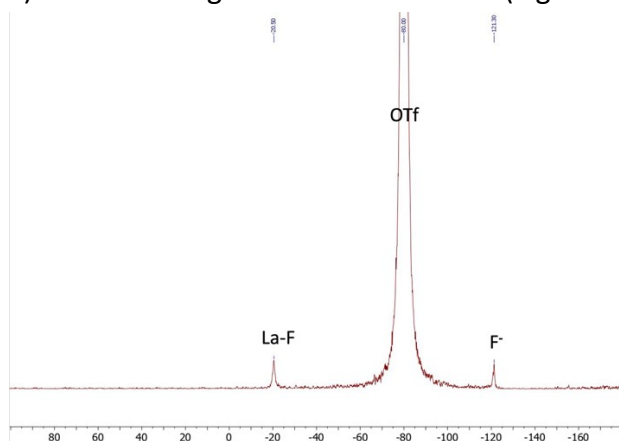

**Figure S8.**  $^{19}\text{F}$  NMR spectrum (376 MHz,  $\text{H}_2\text{O}$ , 298 K) after the addition of 1 equiv. of TBAF to complex **3** in aq.  $\text{NH}_4\text{OAc}$  (pH=5).

### Synthesis and $^{19}\text{F}$ -fluorination of $[\text{La}(\text{DOTpy})(\text{OTf})]^{2+}$ in MeOH.

$^{19}\text{F}$  NMR indicated a resonance of triflate ( $\delta = -80$  ppm) and a new resonance ( $\delta = 34$  ppm) that was assigned to a “La–F” bond (Figure S11). The reaction mixture was crystallized by  $\text{Et}_2\text{O}$  vapour diffusion, resulting in colourless crystals (130.0 mg; 74%) of  $[\text{LaF}(\text{DOTpy})][\text{OTf}]_2$  (**8**) suitable for X-ray diffraction Anal. Calcd for  $\text{C}_{34}\text{H}_{40}\text{N}_8\text{F}_7\text{LaO}_6\text{S}_2$  (**8**): C, 41.12; H 4.06; N, 11.29. Found: C, 41.41; H 4.41; N, 11.16.

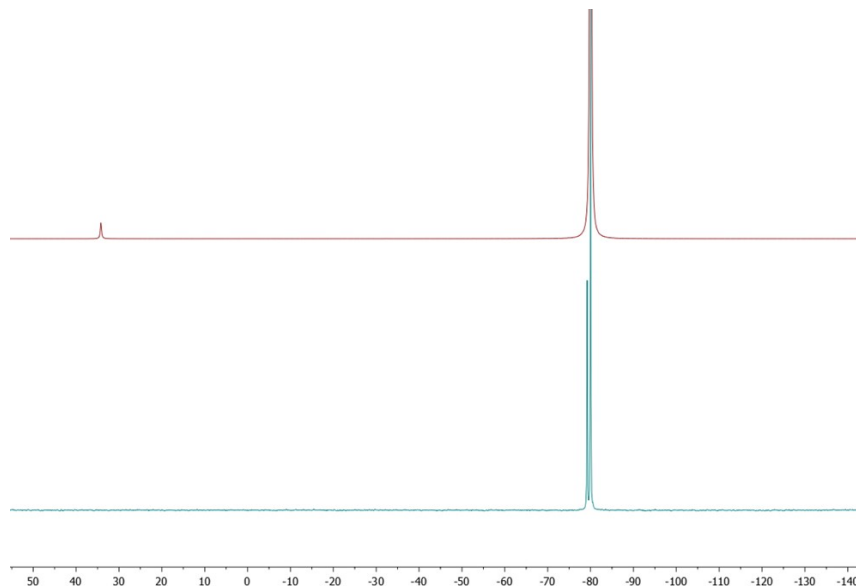

**Figure S9.**  $^{19}\text{F}$  NMR spectrum (376 MHz, MeOD, 298 K) of  $[\text{La}(\text{DOTpy})(\text{OTf})]\text{OTf}_2$  **4** (bottom) and the reaction mixture after the addition of TBAF to **4** (top).

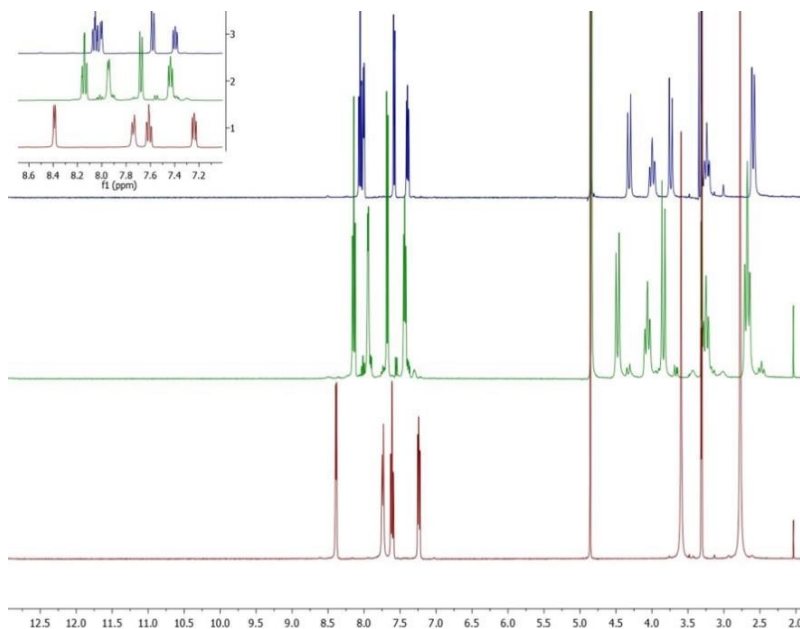

**Figure S10.**  $^1\text{H}$  NMR spectra (400 MHz, MeOD, 298 K) of DOTpy ligand (bottom);  $[\text{La}(\text{DOTpy})(\text{OTf})]\text{OTf}_2$  (**4**) (middle); and  $[\text{LaF}(\text{DOTpy})]\text{OTf}_2$  (**8**) (top).

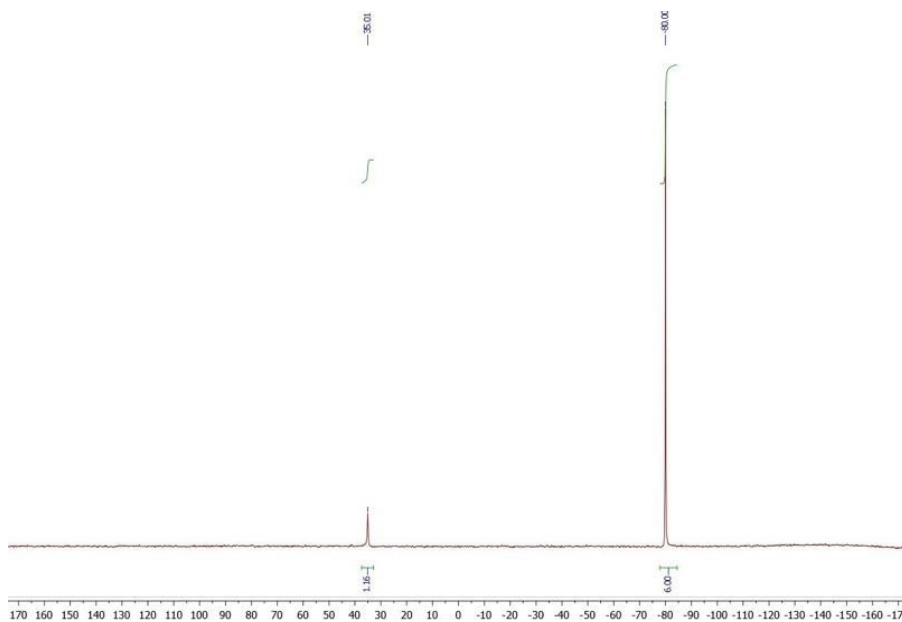

**Figure S11.**  $^{19}\text{F}$  NMR spectrum (376 MHz, MeOD, 298 K) of crystals of  $[\text{LaF}(\text{DOTpy})]\text{OTf}_2$  (**8**).

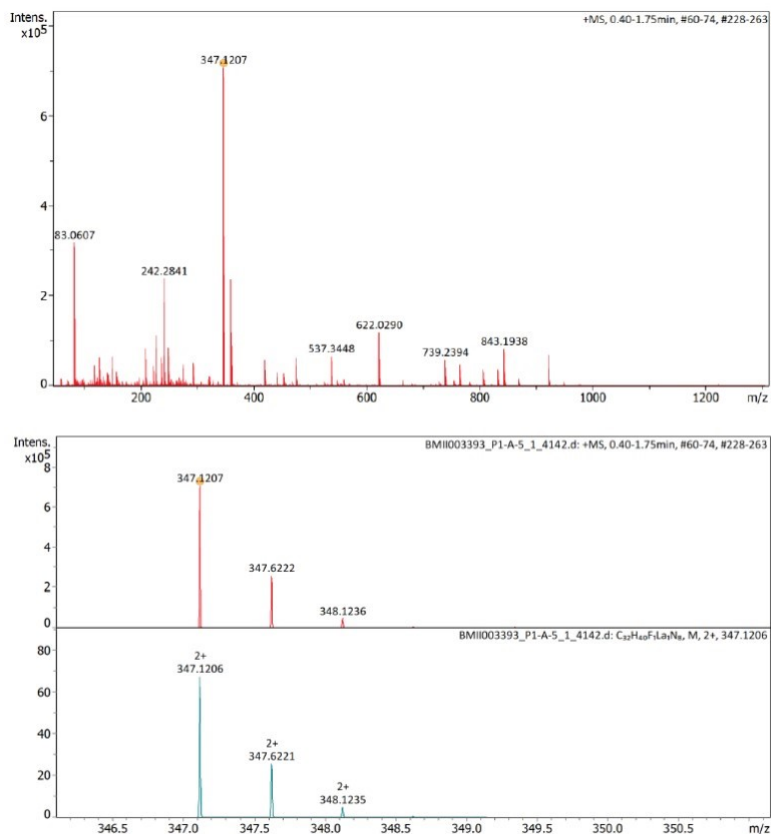

**Figure S12.** HR-MS:  $(\text{C}_{32}\text{H}_{40}\text{FLa}_8)^{2+}$   $m/z = 347.1206$   $^{2+}$  found: 347.1207

**Water stability of [LaF(DOTpy)]OTf<sub>2</sub> (8).**

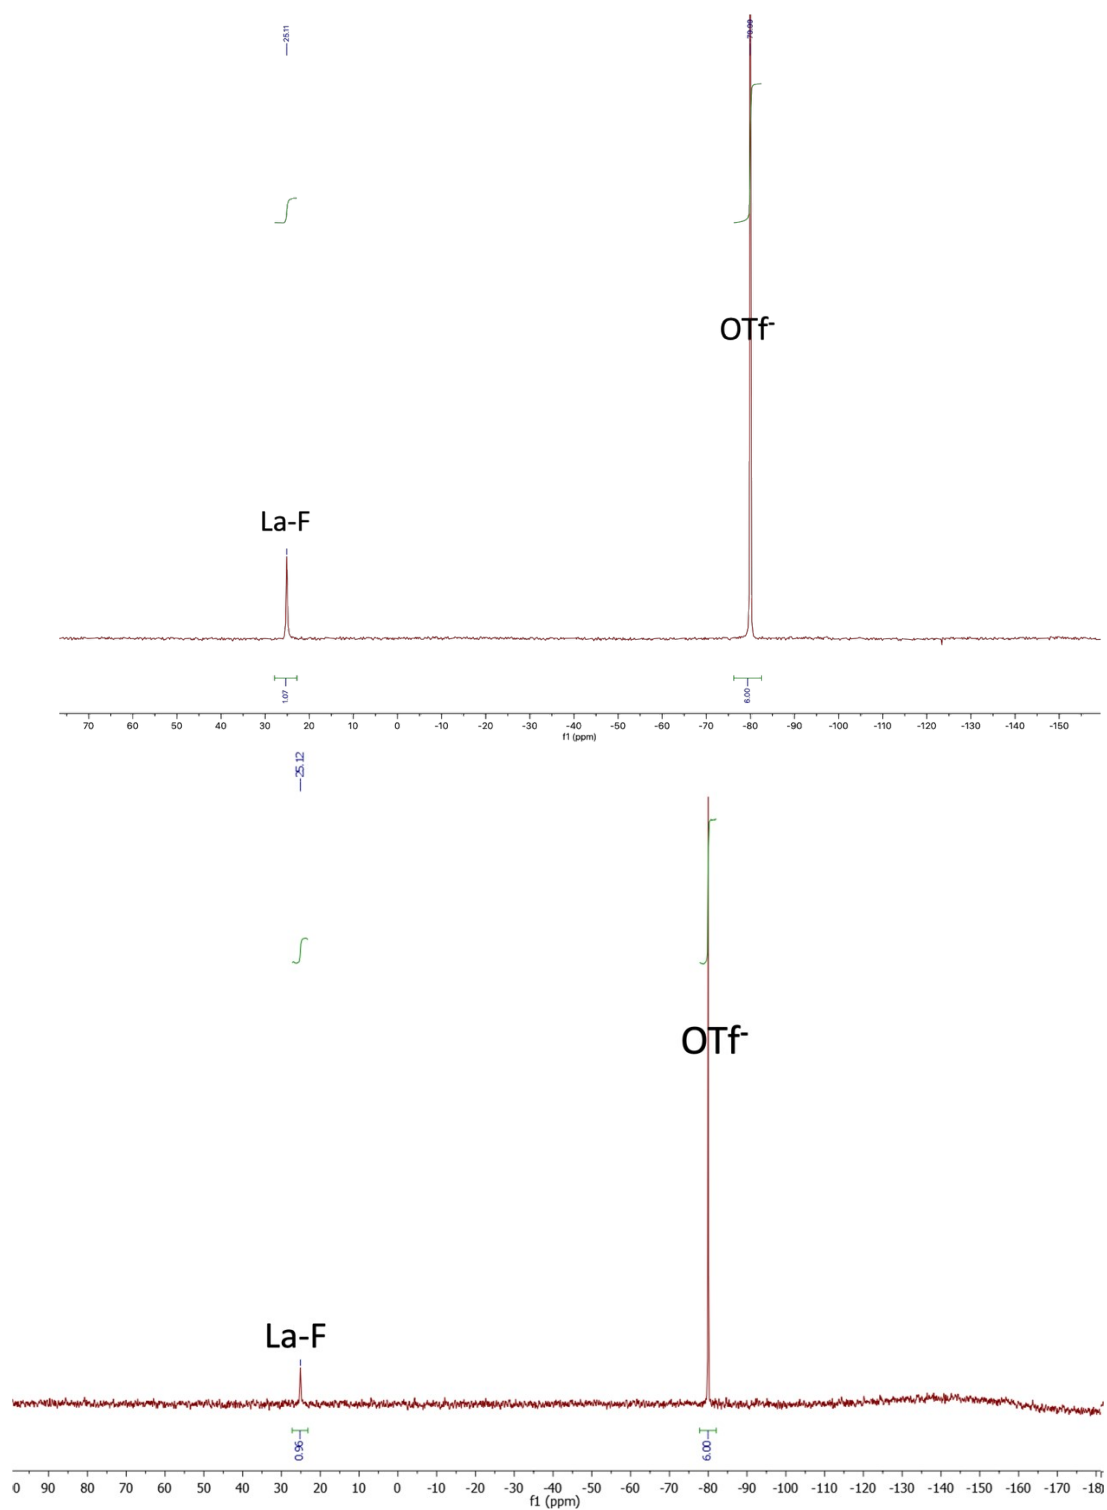

**Figure S13.** <sup>19</sup>F NMR spectra (376 MHz, D<sub>2</sub>O, pH7, 298 K) of [LaF(DOTpy)]OTf<sub>2</sub> immediately (top) and 3 weeks (bottom) after the addition of D<sub>2</sub>O.

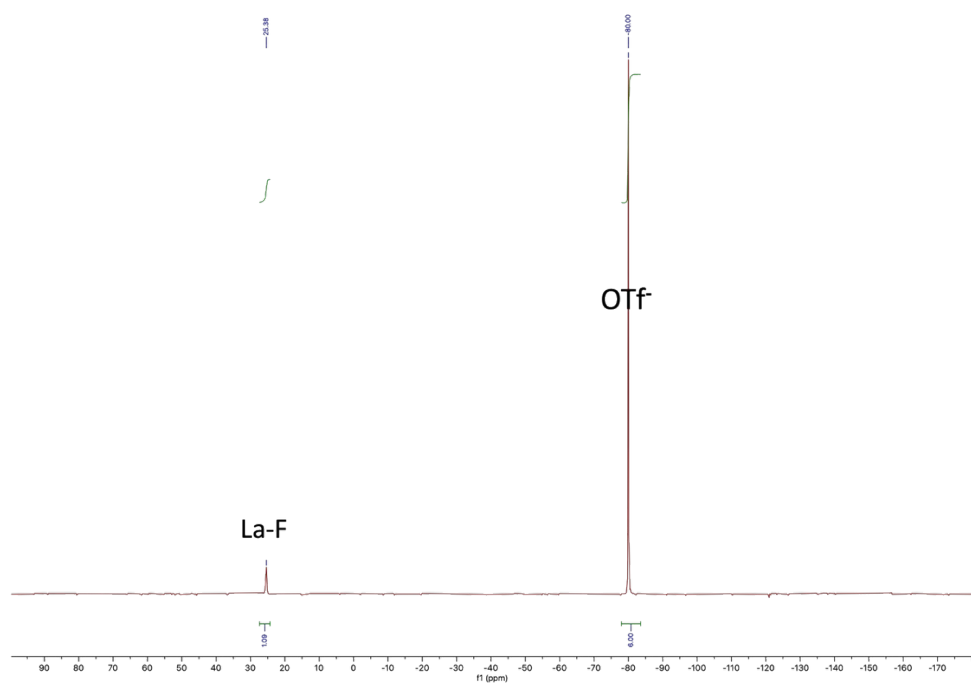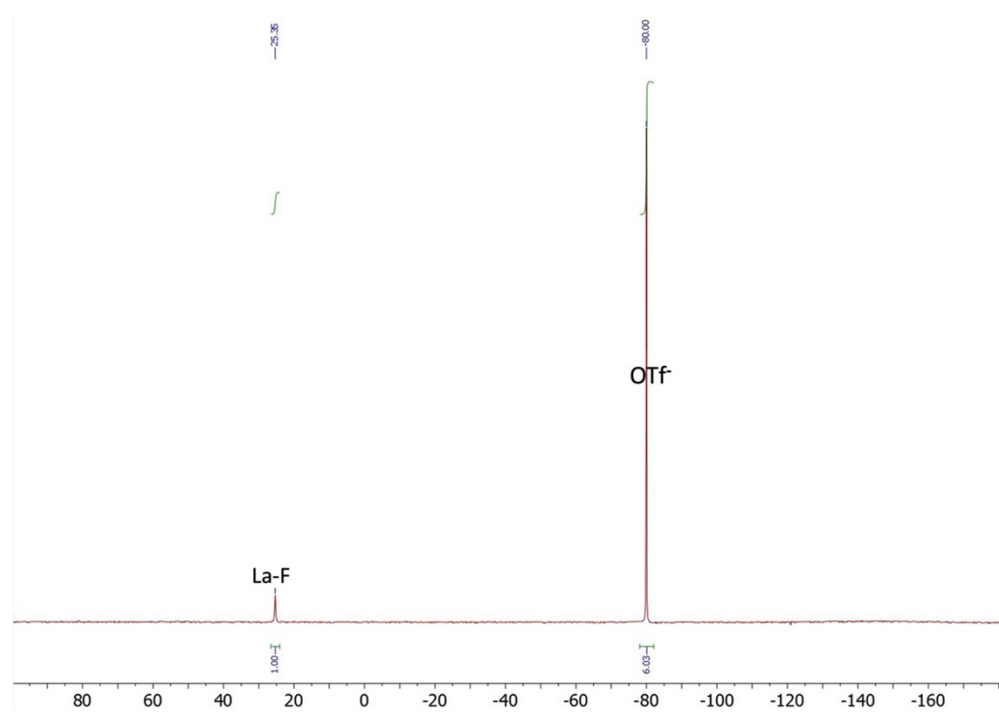

**Figure S14.**  $^{19}\text{F}$  NMR spectra (376 MHz,  $\text{D}_2\text{O}$ , pH5, 298 K) of  $[\text{LaF}(\text{DOTpy})]\text{OTf}_2$  immediately (top) and 3 weeks (bottom) after the addition of  $\text{D}_2\text{O}$ .

## 2.2 $^{18}\text{F}$ -fluorination

### Stability of $[\text{LaF}(\text{DOTpy})]\text{OTf}_2$ under different conditions.

Firstly, the stability of complex **8** was evaluated using HPLC. A methanol solution of complex **8** was analyzed with Method 1 immediately after dissolution and repeated 1 day later. HPLC chromatograms monitored at 270 nm indicated that the complex **8** remains stable in MeOH for at least 1 day (Figure S15). Further, the solution of **8** was passed through an N-alumina cartridge and analyzed by HPLC, demonstrating the stability of the complex following N-alumina purification (Figure S16). Lastly, an HPLC fraction was collected between 5.4 and 6 minutes (pH=4) and was reinjected into the HPLC using Method 1. The HPLC chromatogram suggested instability of  $[\text{LaF}(\text{DOTpy})]\text{OTf}_2$  in the HPLC eluent (Figure S17). For the following radiofluorination experiments no TFA was added to the HPLC eluents.

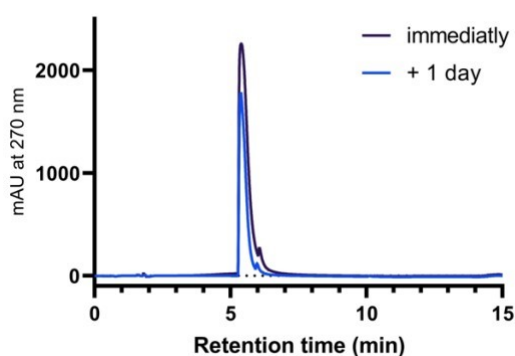

**Figure S15.** HPLC chromatograms of  $[\text{LaF}(\text{DOTpy})]\text{OTf}_2$  with Method 1 immediately and 1 day after the dissolution in MeOH.

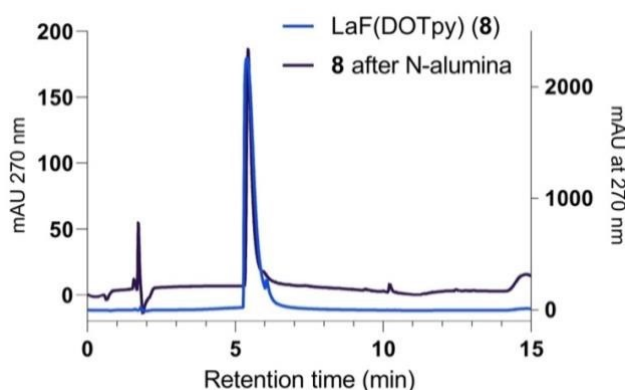

**Figure S16.** HPLC chromatograms of  $[\text{LaF}(\text{DOTpy})]\text{OTf}_2$  (**8**; blue) and **8** after N-alumina cartridge purification (purple) with Method 1.

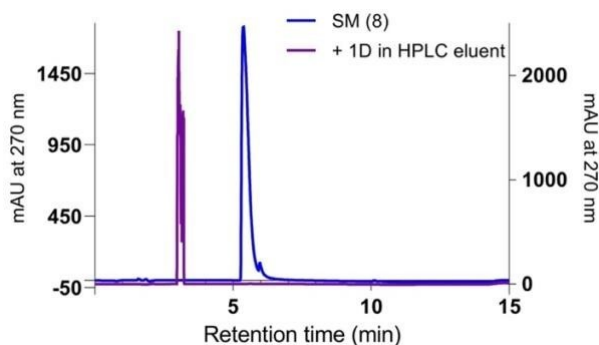

**Figure S17.** HPLC chromatograms of  $[\text{LaF}(\text{DOTpy})]\text{OTf}_2$  (blue) and reinjected HPLC fraction (5.4–6 minutes; purple) with Method 1.

### $^{18}\text{F}$ -fluorination via $\text{La}[^{18}\text{F}]\text{F}$ intermediate.

To 100  $\mu\text{L}$  of a 10 mM stock solution of  $\text{La}(\text{OTf})_3(\text{H}_2\text{O})_2$  in MeOH 100  $\mu\text{L}$  of  $^{18}\text{F}[\text{BnEt}_3\text{NF}]$  in methanol (50-100 MBq) were added. The reaction mixture was left at 60  $^\circ\text{C}$  for 30 minutes, resulting in  $^{18}\text{F}[\text{LaF}(\text{OTf})_2]$ . Then, 20  $\mu\text{L}$  of a 100 mM stock solution of DOTpy ligand in methanol were added to the reaction mixture. The reaction mixture was left at 60  $^\circ\text{C}$  for 5 minutes resulting in  $^{18}\text{F}[\text{LaF}(\text{DOTpy})]$  (MA = 0.5-0.2 GBq/ $\mu\text{mol}$  35 mins post-EOS). The product was analyzed by radioHPLC (Figure S18).

The identity of the radiolabeled complex was further confirmed by co-injection of a large excess of non-radioactive reference complex **8**,  $[\text{LaF}(\text{DOTpy})]\text{OTf}_2$ , into the radiolabeling mixture, followed by radioHPLC analysis.

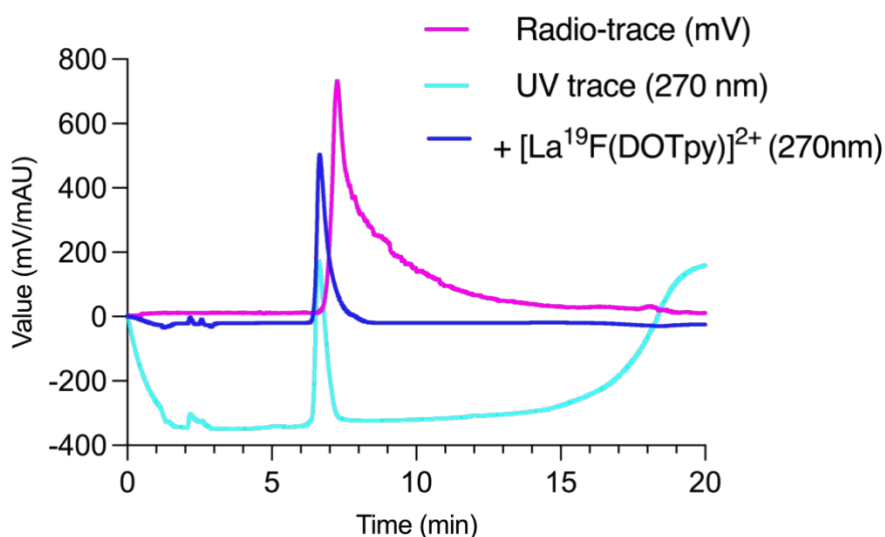

**Figure S18.** Radio-HPLC chromatogram of  $^{18}\text{F}[\text{LaF}(\text{DOTpy})]^{2+}$  by indirect radiofluorination approach.

## 2.2 Computational Methods

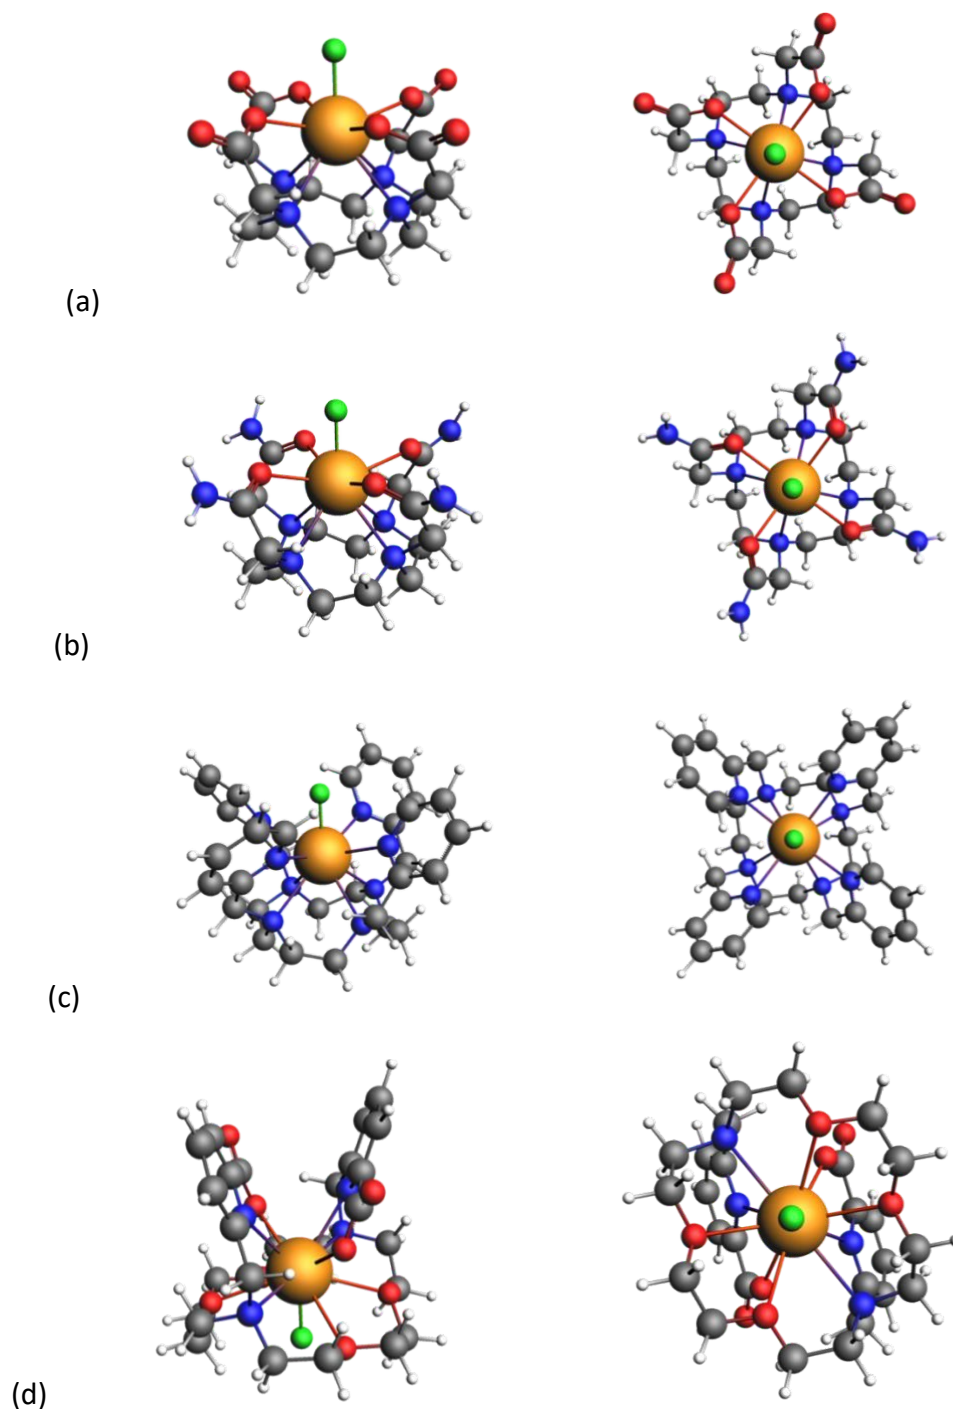

**Figure S19.** Optimized geometries of (a)  $[\text{LaF}(\text{DOTA})]^{2-}$  (b)  $[\text{LaF}(\text{DOTAM})]^{2+}$  (c)  $[\text{LaF}(\text{DOTpy})]^{2+}$  (d)  $[\text{LaF}(\text{macropa})]^{0}$  at PBE-D3(BJ)/TZ2P level of theory under aqueous condition. (Left: side view; Right: top view.) (Yellow: Lanthanum; Grey: carbon; White: Hydrogen; Blue: Nitrogen; Red: Oxygen; Green: Fluorine).

| Complex      | Bond type               | Distance |
|--------------|-------------------------|----------|
| La-X-DOTA    | La-F                    | 2.281    |
|              | La-O (OH <sup>-</sup> ) | 2.335    |
|              | La-O (H <sub>2</sub> O) | 2.759    |
| La-X-DOTAM   | La-F                    | 2.227    |
|              | La-O (OH <sup>-</sup> ) | 2.268    |
|              | La-O (H <sub>2</sub> O) | 2.632    |
| La-X-DOTpy   | La-F                    | 2.216    |
|              | La-O (OH <sup>-</sup> ) | 2.252    |
|              | La-O (H <sub>2</sub> O) | 2.644    |
| La-X-Macropa | La-F                    | 2.239    |
|              | La-O (OH <sup>-</sup> ) | 2.304    |
|              | La-O (H <sub>2</sub> O) | 2.649    |

**Table S1.** La-X distances (Å) in the optimized structures of [LaX(L)] (X=F<sup>-</sup>, OH<sup>-</sup> and H<sub>2</sub>O; L=DOTA<sup>4-</sup>, DOTAM, DOTpy and macropa<sup>2-</sup>)

|         | La complexes                             | Formation Reaction Energy | Ligand Substitution Reaction Energy |
|---------|------------------------------------------|---------------------------|-------------------------------------|
| DOTA    | LaDOTA <sup>-</sup>                      | -105.72                   | 7.00                                |
|         | La(H <sub>2</sub> O)DOTA <sup>-</sup>    | -105.94                   | 6.78                                |
|         | La(OH)DOTA <sup>2-</sup>                 | -113.34                   | -0.62                               |
|         | LaFDOTA <sup>2-</sup>                    | -112.72                   | 0                                   |
| DOTAM   | LaDOTAM <sup>3+</sup>                    | -65.95                    | 17.82                               |
|         | La(H <sub>2</sub> O)DOTAM <sup>3+</sup>  | -67.91                    | 15.86                               |
|         | La(OH)DOTAM <sup>2+</sup>                | -86.97                    | -3.20                               |
|         | LaFDOTAM <sup>2+</sup>                   | -83.77                    | 0                                   |
| DOTpy   | LaDOTpy <sup>3+</sup>                    | -65.95                    | 25.54                               |
|         | La(H <sub>2</sub> O)DOTpy <sup>3+</sup>  | -69.83                    | 21.66                               |
|         | La(OH)DOTpy <sup>2+</sup>                | -92.74                    | -1.25                               |
|         | LaFDOTpy <sup>2+</sup>                   | -91.49                    | 0                                   |
| Macropa | LaMacropa <sup>+</sup>                   | -90.01                    | 7.14                                |
|         | La(H <sub>2</sub> O)Macropa <sup>+</sup> | -89.10                    | 8.05                                |
|         | La(OH)Macropa                            | -99.83                    | -2.68                               |
|         | LaFMacropa                               | -97.15                    | 0                                   |

**Table S2.** Calculated  $\Delta G$  and  $\Delta\Delta G$  (in kcal/mol) of complex formation reactions (R1) and axial ligand substitution reactions (R2) relative to [LaFL] complexes.

| Fragments                |                  | Energy terms     |                    |                     |          |                  |          |                   |         |
|--------------------------|------------------|------------------|--------------------|---------------------|----------|------------------|----------|-------------------|---------|
|                          |                  | $\Delta E_{int}$ | $\Delta E_{Pauli}$ | $\Delta E_{elstat}$ |          | $\Delta E_{orb}$ |          | $\Delta E_{disp}$ |         |
| [LaDOTA] <sup>-</sup>    | F <sup>-</sup>   | -4.64            | 73.20              | -9.74               | (12.51%) | -67.06           | (86.15%) | -1.03             | (1.32%) |
|                          | OH <sup>-</sup>  | -8.52            | 92.11              | -26.55              | (26.38%) | -72.26           | (71.81%) | -1.81             | (1.80%) |
|                          | H <sub>2</sub> O | -16.56           | 33.71              | -32.48              | (64.61%) | -15.20           | (30.24%) | -2.59             | (5.15%) |
| [LaDOTAM] <sup>3+</sup>  | F <sup>-</sup>   | -271.31          | 89.04              | -279.10             | (77.45%) | -80.15           | (22.24%) | -1.09             | (0.30%) |
|                          | OH <sup>-</sup>  | -277.23          | 111.77             | -297.02             | (76.35%) | -90.10           | (23.16%) | -1.88             | (0.48%) |
|                          | H <sub>2</sub> O | -20.31           | 25.44              | -28.66              | (62.64%) | -14.72           | (32.17%) | -2.37             | (5.18%) |
| [LaDOTPy] <sup>3+</sup>  | F <sup>-</sup>   | -283.27          | 100.87             | -300.12             | (78.13%) | -82.05           | (21.36%) | -1.97             | (0.51%) |
|                          | OH <sup>-</sup>  | -287.27          | 121.54             | -315.10             | (77.08%) | -90.35           | (22.10%) | -3.37             | (0.82%) |
|                          | H <sub>2</sub> O | -18.36           | 29.49              | -29.38              | (61.40%) | -14.27           | (29.82%) | -4.21             | (8.80%) |
| [LaMacropa] <sup>+</sup> | F <sup>-</sup>   | -157.01          | 94.08              | -176.00             | (70.09%) | -74.07           | (29.50%) | -1.92             | (0.76%) |
|                          | OH <sup>-</sup>  | -161.15          | 122.13             | -198.59             | (70.10%) | -81.20           | (28.66%) | -3.49             | (1.23%) |
|                          | H <sub>2</sub> O | -15.87           | 36.14              | -33.07              | (63.58%) | -14.65           | (28.17%) | -4.28             | (8.23%) |

**Table S3.** EDA results (in kcal/mol) between fragments LaL (L=DOTA, DOTAM, DOTPy and Macropa) and fragments X (X = F<sup>-</sup>, OH<sup>-</sup> and H<sub>2</sub>O) for [LaXL] complexes under gas phase using structures optimized in aqueous phase. \* Values in percentage show the contribution of each attractive energy term to the total attractive energy term ( $\Delta E_{elstat} + \Delta E_{orb} + \Delta E_{disp}$ ).

### Coordinates for La complexes

#### LaDOTA<sup>-</sup>

|    |                  |                   |                   |
|----|------------------|-------------------|-------------------|
| La | 0.02795578580088 | -0.06364508057024 | -0.08826244445213 |
| N  | 2.08678402368219 | -0.47560157613946 | -1.86421902705838 |
| C  | 2.14072930720928 | 0.57143229370796  | -2.91114238697827 |
| H  | 1.41967751464677 | 0.30575015553750  | -3.69352508232694 |
| H  | 3.13266237848390 | 0.58628371841500  | -3.39658984083134 |
| C  | 1.95774162601462 | -1.82157605663209 | -2.47674929455814 |
| H  | 2.24928463699601 | -2.55815487537739 | -1.71778853011899 |
| H  | 2.66888571195408 | -1.93259699364225 | -3.31434607721929 |
| C  | 3.30161269287804 | -0.44711675507568 | -1.02741515824694 |
| C  | 3.14421438695124 | -1.22625441764300 | 0.28846778998166  |
| O  | 1.93959108372834 | -1.39431017445777 | 0.71703115777250  |
| O  | 4.17707375094541 | -1.60987641295466 | 0.87266412846270  |
| H  | 3.51954260942883 | 0.59205191982520  | -0.74324353347852 |
| H  | 4.17957509441321 | -0.82480181297594 | -1.57868535787438 |
| N  | 0.47769154235867 | 2.06356084278690  | -1.77620417168500 |

|   |                   |                   |                   |
|---|-------------------|-------------------|-------------------|
| C | -0.55036101937524 | 2.15949663660498  | -2.83872965493765 |
| H | -0.27052998695716 | 1.47000558407864  | -3.64427478022053 |
| H | -0.55679580254703 | 3.16994359873026  | -3.28444708783556 |
| C | 1.83478026691045  | 1.95638191878831  | -2.36834095829637 |
| H | 2.55740681362531  | 2.21783229010963  | -1.58541952384618 |
| H | 1.96167321233830  | 2.69876647793118  | -3.17603258412110 |
| C | 0.43418133606091  | 3.24477258214697  | -0.89330426145349 |
| C | 1.18896129164492  | 3.03454716940883  | 0.42926271004458  |
| O | 1.34490998956599  | 1.81386224253699  | 0.81485363393116  |
| O | 1.56598281437073  | 4.04289069619690  | 1.05880662060415  |
| H | -0.61003411477689 | 3.45241656340683  | -0.62002145335153 |
| H | 0.82228475142088  | 4.14321386040439  | -1.40279433208531 |
| N | -2.06236565815964 | 0.45369053690582  | -1.79687596481604 |
| C | -2.13673468476572 | -0.53142781713199 | -2.90089775090852 |
| H | -1.43075583097891 | -0.22098988926566 | -3.68053096144384 |
| H | -3.13788159982526 | -0.51909594093419 | -3.36711325972119 |
| C | -1.94473821874370 | 1.83302704634164  | -2.33299152293814 |
| H | -2.22019037552101 | 2.52435896981079  | -1.52697369011514 |
| H | -2.67252459927910 | 1.99220583195475  | -3.14823596559741 |
| C | -3.26103271879270 | 0.37465314971895  | -0.94024502952878 |
| C | -3.07880179909840 | 1.07526820728369  | 0.41585568840262  |
| O | -1.86620989803174 | 1.21758605917999  | 0.83093194742182  |
| O | -4.10020349361943 | 1.42546349433892  | 1.03981511772128  |
| H | -3.47288914263141 | -0.67973721515130 | -0.71304834578541 |
| H | -4.14952963884757 | 0.78252625559417  | -1.45173582234093 |
| N | -0.45304015901164 | -2.08520931988945 | -1.88510789327152 |
| C | 0.55327852292818  | -2.11922100347655 | -2.97197272777780 |
| H | 0.25775066518111  | -1.38491804905618 | -3.73101603459642 |
| H | 0.55011971151014  | -3.10250078283377 | -3.47493077483587 |
| C | -1.82110572839506 | -1.94507443289437 | -2.44415445252039 |
| H | -2.52899899318601 | -2.25198604870233 | -1.66429269631909 |
| H | -1.96338085121316 | -2.63961802522424 | -3.29089201723100 |
| C | -0.39268395544564 | -3.31643256836290 | -1.07423539121413 |
| C | -1.12023134355075 | -3.18621969324753 | 0.27370002871859  |
| O | -1.27064799149460 | -1.99049239602383 | 0.73239939882577  |
| O | -1.48277805603792 | -4.23065909734793 | 0.85080318453709  |
| H | 0.65667966725216  | -3.53915093109188 | -0.83455674419087 |
| H | -0.79119552801485 | -4.18356073564259 | -1.62799882029541 |

**La(H<sub>2</sub>O)DOTA<sup>-</sup>**

|    |                   |                   |                   |
|----|-------------------|-------------------|-------------------|
| La | -0.03765350856711 | -0.10899786068056 | -0.08097660323210 |
| N  | 2.06147669452247  | -0.50357177045944 | -1.83453487644359 |
| C  | 2.14023127252407  | 0.56256797598009  | -2.85998278824109 |
| H  | 1.43562809771269  | 0.31391856749815  | -3.66249267805326 |
| H  | 3.14218628678912  | 0.58272908547393  | -3.32436543969828 |
| C  | 1.93584312776500  | -1.83602003452763 | -2.47638931351616 |
| H  | 2.21034156653511  | -2.59004254466363 | -1.72856567506526 |
| H  | 2.65979143774295  | -1.93402567936357 | -3.30486355785608 |

|   |                   |                   |                   |
|---|-------------------|-------------------|-------------------|
| C | 3.26608646426244  | -0.49746313449189 | -0.98200591758531 |
| C | 3.09720581908972  | -1.32380103191919 | 0.30244184505671  |
| O | 1.88781372490035  | -1.51117736987881 | 0.70842316569525  |
| O | 4.12425594612550  | -1.72465251793267 | 0.88492614574710  |
| H | 3.47380780226811  | 0.53286455531547  | -0.66058551700443 |
| H | 4.15267802471321  | -0.85176214763806 | -1.53548850147422 |
| N | 0.45815630345350  | 2.04518010396932  | -1.73896496926386 |
| C | -0.54174922040100 | 2.14895553474439  | -2.82678913338418 |
| H | -0.24514774394171 | 1.46005857152428  | -3.62671589284368 |
| H | -0.53134707954057 | 3.16045449238502  | -3.27060383304599 |
| C | 1.82833793388701  | 1.93942728357534  | -2.29903290788922 |
| H | 2.53288771419930  | 2.18066908017036  | -1.49368567503382 |
| H | 1.97999590487999  | 2.69553896475078  | -3.09006072542018 |
| C | 0.39439992552808  | 3.22566619924553  | -0.85638666625113 |
| C | 1.12462728171615  | 3.02464800064584  | 0.48004631593420  |
| O | 1.31504149441352  | 1.80280626334126  | 0.85034825439340  |
| O | 1.45187090468142  | 4.03468046211011  | 1.13141068034800  |
| H | -0.65520957879483 | 3.42943298146485  | -0.60253188813393 |
| H | 0.78904881196235  | 4.12572291875173  | -1.35863127534257 |
| N | -2.08944501410651 | 0.44311275010657  | -1.84239900691854 |
| C | -2.14974902727484 | -0.52878748464875 | -2.95835815087801 |
| H | -1.43195605932487 | -0.21126145031590 | -3.72418469166978 |
| H | -3.14384111904518 | -0.50896436924595 | -3.43954053252272 |
| C | -1.95101270854918 | 1.82661836673592  | -2.36095938046575 |
| H | -2.24316155502350 | 2.51232689502426  | -1.55627594477450 |
| H | -2.65586229882922 | 1.99848400362289  | -3.19384093146205 |
| C | -3.30443619177127 | 0.36521303579802  | -1.00903182816708 |
| C | -3.14254826328058 | 1.07351896739045  | 0.34604441038182  |
| O | -1.93736300005508 | 1.21286484457654  | 0.78090821213669  |
| O | -4.17332352685307 | 1.43324249983773  | 0.94981039949165  |
| H | -3.52002365784391 | -0.68876233955197 | -0.78334653794100 |
| H | -4.18326978717454 | 0.77302571798122  | -1.53734073546861 |
| N | -0.48726703482596 | -2.10061714779011 | -1.93325715625060 |
| C | 0.53817168306399  | -2.11565891556442 | -3.00145026613636 |
| H | 0.26033390886175  | -1.36263724551223 | -3.74879232486217 |
| H | 0.53955578303089  | -3.08710680040711 | -3.52732948671930 |
| C | -1.84478590852546 | -1.94910687877804 | -2.51377894486738 |
| H | -2.56684622050786 | -2.26177208175697 | -1.74944703304119 |
| H | -1.97516623107807 | -2.63324884453251 | -3.37123426519132 |
| C | -0.44425625314261 | -3.34545383176093 | -1.14244592958866 |
| C | -1.20975854536766 | -3.23425509196095 | 0.18604362357064  |
| O | -1.37282255378967 | -2.04573045423086 | 0.65718106987324  |
| O | -1.58892001122898 | -4.28684438911423 | 0.73788185505198  |
| H | 0.59890800822329  | -3.56969157909099 | -0.87914668263989 |
| H | -0.82798321579952 | -4.20386922065150 | -1.71997176453069 |
| O | 0.45935824370592  | -0.05133220215489 | 2.63194353975875  |
| H | 0.92739003560023  | 0.79636936267742  | 2.44693219001744  |
| H | 1.16587511248465  | -0.72688306607372 | 2.55869372141707  |

**La(OH)DOTA<sup>2-</sup>**

|    |                   |                   |                   |
|----|-------------------|-------------------|-------------------|
| La | 0.01935885428462  | -0.02488421226851 | 0.12543472507792  |
| N  | 2.08735626417825  | -0.47036553138372 | -1.81600916074041 |
| C  | 2.14033847289695  | 0.56447076635071  | -2.86825197861303 |
| H  | 1.42173799311433  | 0.29045629597489  | -3.64992705405530 |
| H  | 3.13348385625160  | 0.57752054389879  | -3.35555186616733 |
| C  | 1.94752533954590  | -1.81241245953788 | -2.42505577263938 |
| H  | 2.23671165108677  | -2.55291040198870 | -1.66979786185002 |
| H  | 2.65145579074392  | -1.93031058284216 | -3.27026852083216 |
| C  | 3.30674385937336  | -0.44502892173964 | -0.99372114413497 |
| C  | 3.17889470230635  | -1.30850514263269 | 0.27219273761221  |
| O  | 1.99254992483838  | -1.53379096367192 | 0.69736650341805  |
| O  | 4.23704483651389  | -1.70668335972379 | 0.81647657124977  |
| H  | 3.49225355426074  | 0.58504920025912  | -0.65679224921369 |
| H  | 4.19362079921933  | -0.76767351981438 | -1.56895102593702 |
| N  | 0.47479677172688  | 2.07623786063090  | -1.76782810466518 |
| C  | -0.53715768515355 | 2.13196262006458  | -2.84215610584594 |
| H  | -0.25012170921424 | 1.41134778107107  | -3.61728679328565 |
| H  | -0.53644024114662 | 3.12502071742154  | -3.32987695989577 |
| C  | 1.83198787034092  | 1.95680892947920  | -2.34759494205165 |
| H  | 2.55180671894756  | 2.22497842038429  | -1.56499217827150 |
| H  | 1.96829331355445  | 2.68589507417215  | -3.16847902734018 |
| C  | 0.42078810912348  | 3.28944064863805  | -0.93705692638932 |
| C  | 1.24978700374666  | 3.15800521957082  | 0.35033962539297  |
| O  | 1.48255539352584  | 1.97044667552415  | 0.76603664801210  |
| O  | 1.61673464886434  | 4.21560420397142  | 0.91812340581513  |
| H  | -0.61844678532856 | 3.46653434707152  | -0.62609678207969 |
| H  | 0.75390453296637  | 4.18170218756699  | -1.49774975499379 |
| N  | -2.07196349127934 | 0.46910472202023  | -1.77614694294092 |
| C  | -2.13909982168429 | -0.53492544501635 | -2.85712852682490 |
| H  | -1.43018279230273 | -0.23861292042949 | -3.63952238929468 |
| H  | -3.13836499792909 | -0.53288131507749 | -3.33194472235504 |
| C  | -1.94060262516938 | 1.82757340341226  | -2.34977067067828 |
| H  | -2.22220216749351 | 2.54705747379506  | -1.57188533571420 |
| H  | -2.65331621006318 | 1.96721116235999  | -3.18414280543338 |
| C  | -3.28099470128036 | 0.42038519919431  | -0.93936952005755 |
| C  | -3.13979917922393 | 1.25708115317354  | 0.34307908891354  |
| O  | -1.94949587010576 | 1.47960712173212  | 0.75666425064108  |
| O  | -4.19315693288464 | 1.63882758359726  | 0.90912921975770  |
| H  | -3.45921421952691 | -0.61781884559843 | -0.62404499080049 |
| H  | -4.17596245111389 | 0.75268909214641  | -1.49628983594566 |
| N  | -0.46120770391610 | -2.08043212193493 | -1.82453111475684 |
| C  | 0.53864711065003  | -2.10305062296108 | -2.91097082818931 |
| H  | 0.24296480737484  | -1.35981263919916 | -3.66112117113301 |
| H  | 0.53355878759454  | -3.08095403956045 | -3.42854035306096 |
| C  | -1.82547842490590 | -1.94221757018129 | -2.38198590758235 |
| H  | -2.53508636131370 | -2.23285361081820 | -1.59788406717556 |

|   |                   |                   |                   |
|---|-------------------|-------------------|-------------------|
| H | -1.97479959746078 | -2.64659910627084 | -3.22208882310060 |
| C | -0.39894035169063 | -3.31680933555688 | -1.03056069780546 |
| C | -1.20338606784901 | -3.21887101120699 | 0.27517527022210  |
| O | -1.41528652379774 | -2.04243245039462 | 0.73453841737609  |
| O | -1.57342229027522 | -4.28950752879376 | 0.81454901644071  |
| H | 0.64442965223802  | -3.50778503467073 | -0.74224231295984 |
| H | -0.74581607331663 | -4.19140163453709 | -1.61046788184421 |
| O | 0.02610257259640  | -0.02554559443281 | 2.46033321733943  |
| H | -0.06914791643906 | 0.88092751876261  | 2.79889440938641  |

**LaFDOTA<sup>2-</sup>**

|    |                   |                   |                   |
|----|-------------------|-------------------|-------------------|
| La | 0.00941806652929  | -0.02640186993535 | 0.11756490936373  |
| N  | 2.07946271992682  | -0.46560519756915 | -1.80052520261593 |
| C  | 2.12830234945879  | 0.56148589421958  | -2.86137142097292 |
| H  | 1.40451898074685  | 0.28369518279374  | -3.63695208127397 |
| H  | 3.11883795297015  | 0.56904435041036  | -3.35353451640681 |
| C  | 1.94775041588450  | -1.81357775620118 | -2.39972578504450 |
| H  | 2.23371931616486  | -2.54681889215710 | -1.63605623482412 |
| H  | 2.65839621761931  | -1.93556763206307 | -3.23838869001241 |
| C  | 3.30083879378897  | -0.42883561588097 | -0.98079838390811 |
| C  | 3.17648361977309  | -1.27395456117939 | 0.29683720802204  |
| O  | 1.98948906702304  | -1.49250604328257 | 0.72749496172856  |
| O  | 4.23358656338338  | -1.66778174842512 | 0.84372872012977  |
| H  | 3.48630584421910  | 0.60520725180015  | -0.65656318482444 |
| H  | 4.18627937565106  | -0.75759474060306 | -1.55428131115413 |
| N  | 0.47008219969334  | 2.07803344476514  | -1.76049346611237 |
| C  | -0.54547692058808 | 2.14536359503100  | -2.83141979254298 |
| H  | -0.25936737002032 | 1.43449831123079  | -3.61585128757189 |
| H  | -0.54729773231782 | 3.14401163406741  | -3.30698371992298 |
| C  | 1.82466356631622  | 1.95687261799698  | -2.34701664545979 |
| H  | 2.54941452047214  | 2.22990298642708  | -1.57063773205258 |
| H  | 1.95558617320281  | 2.68159635134808  | -3.17217492071925 |
| C  | 0.42458660991578  | 3.28429347476016  | -0.91918970468543 |
| C  | 1.25845408097836  | 3.13662083103438  | 0.36336810287623  |
| O  | 1.46969930758976  | 1.94214650708282  | 0.77687625522538  |
| O  | 1.64557252054940  | 4.18366349794806  | 0.93386866025310  |
| H  | -0.61254860803013 | 3.46315327482201  | -0.60116283752085 |
| H  | 0.75799761356710  | 4.18021498922831  | -1.47337867152647 |
| N  | -2.07464065951527 | 0.46915114655147  | -1.77584070413426 |
| C  | -2.13015230784991 | -0.52836285025269 | -2.86429866262747 |
| H  | -1.41118181514007 | -0.22931608345738 | -3.63644250762320 |
| H  | -3.12374206766107 | -0.52251515567628 | -3.35028033214712 |
| C  | -1.94657929162981 | 1.83358854010043  | -2.33778093506773 |
| H  | -2.22812715197882 | 2.54515741435827  | -1.55232358527283 |
| H  | -2.66197560779264 | 1.97891562838810  | -3.16864950216669 |
| C  | -3.29020684560358 | 0.40911209453256  | -0.94897069295509 |
| C  | -3.15628517562546 | 1.21754902364976  | 0.35121979294279  |
| O  | -1.96624914895231 | 1.42245008968988  | 0.78040481385403  |

|   |                   |                   |                   |
|---|-------------------|-------------------|-------------------|
| O | -4.20942101618772 | 1.59493716525791  | 0.91699647068847  |
| H | -3.47350776737217 | -0.63371717673462 | -0.65283072022917 |
| H | -4.17963076111812 | 0.75395686103920  | -1.50661417567919 |
| N | -0.46532211298209 | -2.07506472993522 | -1.81563096214999 |
| C | 0.54385920897834  | -2.11168439429950 | -2.89403664048514 |
| H | 0.25306987247368  | -1.37952565792065 | -3.65690827548090 |
| H | 0.54327579515094  | -3.09680052447931 | -3.39699913498941 |
| C | -1.82346660471617 | -1.93745427818241 | -2.39036629448700 |
| H | -2.54352711051977 | -2.23186850303569 | -1.61745139698136 |
| H | -1.95965578350384 | -2.63898195533910 | -3.23450864079248 |
| C | -0.41357844337552 | -3.30528423979952 | -1.01008709390335 |
| C | -1.23521393656570 | -3.19520010057669 | 0.28398986122669  |
| O | -1.44613677222615 | -2.01306448672974 | 0.73146915404385  |
| O | -1.61603922387203 | -4.25855170967513 | 0.82796961804627  |
| H | 0.62618666512925  | -3.49381328725397 | -0.70656271805985 |
| H | -0.75242835166804 | -4.18459533348213 | -1.58710762564034 |
| F | 0.01694116965626  | -0.05873763440664 | 2.39869766162357  |

### LaDOTAM<sup>3+</sup>

|   |                   |                   |                   |
|---|-------------------|-------------------|-------------------|
| N | 2.08091596893917  | -0.43123151005389 | -1.78219683156654 |
| C | 2.11915295569604  | 0.61838250050335  | -2.83317170525942 |
| H | 1.41599436174364  | 0.32718729270470  | -3.62126432722514 |
| H | 3.11480692508251  | 0.65672585064780  | -3.30479215571361 |
| C | 1.99911509240165  | -1.78324191686146 | -2.40233948093955 |
| H | 2.30985897041041  | -2.51811708982643 | -1.64947591646018 |
| H | 2.71723217618001  | -1.86497395640541 | -3.23458157609827 |
| C | 3.29269666901456  | -0.36072053221990 | -0.94461271351968 |
| C | 3.10577625674381  | -1.18561654033317 | 0.31513423060560  |
| O | 1.94937739399326  | -1.33518075579620 | 0.80096725777608  |
| N | 4.18343808540769  | -1.70125152350590 | 0.87826336206220  |
| H | 3.45294100285735  | 0.67683588072771  | -0.61906905244353 |
| H | 4.19271384131544  | -0.67290659262431 | -1.49867556555825 |
| N | 0.40010775262083  | 2.06393398887833  | -1.72267203544486 |
| C | -0.61643958925298 | 2.12767742422577  | -2.80462233010476 |
| H | -0.30112939815620 | 1.44292836205749  | -3.59958194421820 |
| H | -0.64005461397081 | 3.13419677442833  | -3.25365277546304 |
| C | 1.77108825932140  | 1.99609401173345  | -2.30184380745763 |
| H | 2.48188656574620  | 2.28946920340351  | -1.51949229360661 |
| H | 1.87849417018009  | 2.73304198515108  | -3.11451523815678 |
| C | 0.30288166400396  | 3.25481296628367  | -0.85829709686526 |
| C | 1.08732659813782  | 3.03729963311042  | 0.42222903824604  |
| O | 1.22494366101992  | 1.86925845529019  | 0.88328973834880  |
| N | 1.58143486158761  | 4.10112196744229  | 1.02917975348700  |
| H | -0.74444281031028 | 3.40697844492012  | -0.56158593230199 |
| H | 0.63168288135404  | 4.16799418907109  | -1.38020137999032 |
| N | -2.09466321993608 | 0.38475461377107  | -1.77789605219917 |
| C | -2.12537226722790 | -0.60721794448065 | -2.88377620830528 |
| H | -1.41601810052866 | -0.27508740053858 | -3.64982088380634 |

|    |                   |                   |                   |
|----|-------------------|-------------------|-------------------|
| H  | -3.11736290089718 | -0.61955011716633 | -3.36451724147776 |
| C  | -2.00991673733542 | 1.76815549209169  | -2.32452227406898 |
| H  | -2.32835654371470 | 2.46178672071122  | -1.53661240738627 |
| H  | -2.72106091250630 | 1.89326451972987  | -3.15740816958830 |
| C  | -3.31096449562709 | 0.26846675221610  | -0.95201562201611 |
| C  | -3.13153490941434 | 1.02402342543596  | 0.35149313904687  |
| O  | -1.97781889938369 | 1.14925240235253  | 0.85056783707012  |
| N  | -4.21265517695531 | 1.50593839556844  | 0.93740468865933  |
| H  | -3.47174910266583 | -0.78510464077780 | -0.68292022827013 |
| H  | -4.20830855586253 | 0.60912014885435  | -1.49336688068057 |
| N  | -0.41565598140427 | -2.10997305174107 | -1.83732730954501 |
| C  | 0.60959613847699  | -2.11497887762696 | -2.91278624961759 |
| H  | 0.30086474865831  | -1.38769364575300 | -3.67174168175537 |
| H  | 0.63688946083747  | -3.09538799192054 | -3.41609373167942 |
| C  | -1.78164052897889 | -2.01143570336097 | -2.42389227040964 |
| H  | -2.49909700562816 | -2.34622484576097 | -1.66458448300423 |
| H  | -1.88185208783696 | -2.70395418444732 | -3.27563490109203 |
| C  | -0.32421202799924 | -3.34600015440648 | -1.03813531850843 |
| C  | -1.12010290745377 | -3.19787605751452 | 0.24518921628616  |
| O  | -1.25908464163452 | -2.05652837033057 | 0.76842235438934  |
| N  | -1.62234329553934 | -4.29229571200050 | 0.78777724369216  |
| H  | 0.72071249793714  | -3.51355787891902 | -0.74114148667718 |
| H  | -0.64762838903433 | -4.22991078333777 | -1.61116186146658 |
| La | -0.01178767844010 | -0.07107270762664 | -0.05074953011584 |
| H  | 1.48242419848012  | 5.02930255423664  | 0.63277117124062  |
| H  | 2.05433978257256  | 4.00319993957886  | 1.92319487474804  |
| H  | -5.12920356888999 | 1.41268501015673  | 0.51360501853777  |
| H  | -4.14161715122430 | 1.95489528394684  | 1.84620038521539  |
| H  | -1.51820884789308 | -5.19761341797352 | 0.34281908435456  |
| H  | -2.10209996314646 | -4.24359726138543 | 1.68221918642730  |
| H  | 5.10117766613265  | -1.59010941050236 | 0.46134522746781  |
| H  | 4.10829170199606  | -2.20058361403189 | 1.76006614240266  |

**La(H<sub>2</sub>O)DOTAM<sup>3+</sup>**

|   |                  |                   |                   |
|---|------------------|-------------------|-------------------|
| N | 2.06262180764639 | -0.51052398595467 | -1.76041056257355 |
| C | 2.13784101510761 | 0.53817543862433  | -2.80859111977180 |
| H | 1.41878390698809 | 0.27747371922000  | -3.59301810804708 |
| H | 3.13100474781610 | 0.53629179067683  | -3.28803654820762 |
| C | 1.91703047256369 | -1.85489911075877 | -2.38437774067815 |
| H | 2.20702916307706 | -2.60584265210809 | -1.63938280594605 |
| H | 2.61999264044382 | -1.96285820036871 | -3.22687808145961 |
| C | 3.28503566842378 | -0.49813808061447 | -0.93710552810494 |
| C | 3.08113358377435 | -1.35536100526296 | 0.29818112934884  |
| O | 1.92618961977447 | -1.49185782623321 | 0.78280693553371  |
| N | 4.15039355047728 | -1.91825897586743 | 0.83775767928770  |
| H | 3.48221055763308 | 0.52489109680330  | -0.58674052961375 |
| H | 4.16875922936033 | -0.82534208133980 | -1.50951333680889 |

|    |                   |                   |                   |
|----|-------------------|-------------------|-------------------|
| N  | 0.48595333363856  | 2.05039812774344  | -1.68806265104330 |
| C  | -0.52681918387168 | 2.14609139838088  | -2.77055834011848 |
| H  | -0.23827944260708 | 1.44182725070846  | -3.55850970653785 |
| H  | -0.50780060640727 | 3.14833301021742  | -3.23041921207974 |
| C  | 1.85063243261097  | 1.92690537391835  | -2.27132191358690 |
| H  | 2.57551845555838  | 2.18396792905251  | -1.48908386014352 |
| H  | 1.98797072403314  | 2.66389140051678  | -3.07986520762065 |
| C  | 0.43958108764002  | 3.24904469197628  | -0.83213834226967 |
| C  | 1.23653623019702  | 3.01539473345458  | 0.43895947140297  |
| O  | 1.36293850453840  | 1.84738462153725  | 0.89884313630306  |
| N  | 1.75586275236264  | 4.07320785196892  | 1.03844556334275  |
| H  | -0.59796981018273 | 3.43919705234285  | -0.52322043003460 |
| H  | 0.79360582021341  | 4.14753878389722  | -1.36402288743070 |
| N  | -2.08154102582323 | 0.47543808388188  | -1.73550959056465 |
| C  | -2.15639095284476 | -0.52367559678294 | -2.83093833547503 |
| H  | -1.43805319274529 | -0.22693703246371 | -3.60308704779415 |
| H  | -3.14978714156837 | -0.50084772312098 | -3.30928688884313 |
| C  | -1.93497017562818 | 1.84875579526722  | -2.29314611859635 |
| H  | -2.22400327250979 | 2.56204638816297  | -1.51171967946102 |
| H  | -2.63833825360867 | 1.99844001393631  | -3.12895122091658 |
| C  | -3.30382518674402 | 0.42393114024161  | -0.91418039719438 |
| C  | -3.09725513691544 | 1.21312794332443  | 0.36512886609257  |
| O  | -1.93983848262635 | 1.33109212818010  | 0.84893572677601  |
| N  | -4.16662873702263 | 1.73757587763282  | 0.94149164878893  |
| H  | -3.50570908119759 | -0.61540289623541 | -0.61879819598999 |
| H  | -4.18638065509561 | 0.78417371763774  | -1.46830321148540 |
| N  | -0.50122606879320 | -2.08693249974812 | -1.78551276690605 |
| C  | 0.50853098995844  | -2.12872351025410 | -2.87431208695410 |
| H  | 0.21847001294266  | -1.38734132949218 | -3.62687116334113 |
| H  | 0.48886750795805  | -3.10751316095823 | -3.38193065711999 |
| C  | -1.86800651986346 | -1.93545596236540 | -2.35744518231186 |
| H  | -2.58971287546782 | -2.22708048346811 | -1.58421147458634 |
| H  | -2.00952289526451 | -2.63532569493027 | -3.19762247193149 |
| C  | -0.45011856415992 | -3.32887806734064 | -0.99377432799822 |
| C  | -1.23224252261319 | -3.16302048484462 | 0.29634678156757  |
| O  | -1.34007370889321 | -2.02349786059036 | 0.82727152999950  |
| N  | -1.75652752028990 | -4.24926888765030 | 0.83795248595844  |
| H  | 0.58983508803744  | -3.53592315612435 | -0.70468417489677 |
| H  | -0.81010744059120 | -4.19755938758651 | -1.56929936950193 |
| La | -0.00699508927571 | -0.05902856430929 | 0.02028087373871  |
| H  | 1.66565619504561  | 5.00234516495346  | 0.64231391039814  |
| H  | 2.23670968437335  | 3.96877344213689  | 1.92732079031994  |
| H  | -5.08712646540757 | 1.65138123945672  | 0.52505515073373  |
| H  | -4.07979955562324 | 2.21882224615106  | 1.83198620838251  |
| H  | -1.67981824594722 | -5.15421469965967 | 0.38676744929113  |
| H  | -2.22863622209929 | -4.19330144699463 | 1.73590340329908  |
| H  | 5.06848204121437  | -1.81723746971941 | 0.41940459919742  |
| H  | 4.06544020325792  | -2.44662851982652 | 1.70133101641915  |

|   |                   |                   |                  |
|---|-------------------|-------------------|------------------|
| O | 0.00706978817141  | -0.10772113859807 | 2.65222816509675 |
| H | 0.78509772211100  | 0.30593589844612  | 3.06879985468100 |
| H | -0.04506050526074 | -0.99947585887683 | 3.04165889798577 |

**La(OH)DOTAM<sup>2+</sup>**

|   |                   |                   |                   |
|---|-------------------|-------------------|-------------------|
| N | 2.08063016497366  | -0.51163977583582 | -1.71209934211417 |
| C | 2.11877234184173  | 0.52381263944194  | -2.76993610389406 |
| H | 1.37808680167258  | 0.25336456889995  | -3.53066078496707 |
| H | 3.09783650289110  | 0.52222858277774  | -3.28122805026790 |
| C | 1.93735628440194  | -1.85971153416492 | -2.31940326001734 |
| H | 2.22244999718928  | -2.60347786539087 | -1.56541306606420 |
| H | 2.64306247092130  | -1.98021589715498 | -3.16048385945522 |
| C | 3.31638117931767  | -0.47582598761987 | -0.91871252682075 |
| C | 3.16566588478067  | -1.34960840991356 | 0.31436432098177  |
| O | 2.03289524774310  | -1.53826843194421 | 0.82210775741232  |
| N | 4.27542946320714  | -1.87062346351352 | 0.82525140578122  |
| H | 3.49474700909003  | 0.54887376592600  | -0.56261687573126 |
| H | 4.19880451799001  | -0.77714138789599 | -1.51037833846616 |
| N | 0.49129825916033  | 2.05869240253704  | -1.64424875884571 |
| C | -0.53486196595861 | 2.15030797330377  | -2.70791726387803 |
| H | -0.25383657356182 | 1.45260502915587  | -3.50448409508029 |
| H | -0.53170709285185 | 3.15505427418120  | -3.16637640827501 |
| C | 1.84049773510845  | 1.92234004814063  | -2.25118587726608 |
| H | 2.58471605834125  | 2.19251364391308  | -1.49251564049020 |
| H | 1.96404536607770  | 2.64174009857460  | -3.07983058959213 |
| C | 0.46235711486439  | 3.26182382564563  | -0.80154216626511 |
| C | 1.33809030102467  | 3.05704180718094  | 0.42316018652599  |
| O | 1.52159171607356  | 1.90355740358646  | 0.88321952666428  |
| N | 1.86701782363508  | 4.14247417195068  | 0.97674480052422  |
| H | -0.56191778977758 | 3.43102411387411  | -0.43877866576553 |
| H | 0.76733881200402  | 4.16628537996606  | -1.35699993818398 |
| N | -2.07692299839718 | 0.46561164901961  | -1.67560857525298 |
| C | -2.12152614743896 | -0.51526354789117 | -2.78468499585167 |
| H | -1.38464279070772 | -0.20698516085427 | -3.53455038002107 |
| H | -3.10335283639262 | -0.48678293252898 | -3.28952156060255 |
| C | -1.93727053015568 | 1.84203921535706  | -2.21834732639273 |
| H | -2.21844267506337 | 2.54834520395772  | -1.42791188809534 |
| H | -2.64799417493082 | 2.00140356525389  | -3.04854679920236 |
| C | -3.31197025842875 | 0.39133175679719  | -0.88211341402466 |
| C | -3.16097733228550 | 1.20811884125294  | 0.38937888434300  |
| O | -2.02710999452141 | 1.38063092723819  | 0.89924888774881  |
| N | -4.27136657478575 | 1.69818145256905  | 0.92956402318496  |
| H | -3.48830942728454 | -0.64908626740655 | -0.57400425643571 |
| H | -4.19521200564387 | 0.71858978414804  | -1.45843886403478 |
| N | -0.48980586547435 | -2.10204647285610 | -1.74351791645823 |
| C | 0.53194171241115  | -2.14365317675802 | -2.81517352652261 |
| H | 0.24759721082031  | -1.40918863974864 | -3.57681252556043 |

|    |                   |                   |                   |
|----|-------------------|-------------------|-------------------|
| H  | 0.52543413819815  | -3.12581278174882 | -3.32012256611205 |
| C  | -1.84134166441190 | -1.93801149582089 | -2.33855364974546 |
| H  | -2.58270250885449 | -2.24643917940687 | -1.59199339025116 |
| H  | -1.96668077456713 | -2.61496453894355 | -3.20187737806249 |
| C  | -0.45797465908218 | -3.34388528660668 | -0.95846339080436 |
| C  | -1.33959441740507 | -3.20006444819000 | 0.27106427384997  |
| O  | -1.53503010435539 | -2.07025117497761 | 0.78150390249757  |
| N  | -1.86166304529853 | -4.31368147810454 | 0.77361444509882  |
| H  | 0.56602523843922  | -3.52641802883915 | -0.60136937063258 |
| H  | -0.75808163143316 | -4.22199135042069 | -1.55720608078461 |
| La | -0.00145081941582 | -0.06917003102972 | 0.20808699673739  |
| H  | 1.72478901405231  | 5.06245573497805  | 0.57548364921023  |
| H  | 2.40624183880373  | 4.06451689321732  | 1.83375206855426  |
| H  | -5.17525307062141 | 1.56708842067733  | 0.48991721558847  |
| H  | -4.22883784296106 | 2.19666402203561  | 1.81324971369605  |
| H  | -1.70940058505323 | -5.21387859351123 | 0.33328149299480  |
| H  | -2.40419892383689 | -4.27836155639937 | 1.63131445526417  |
| H  | 5.17774963716360  | -1.72351434990420 | 0.38727886497513  |
| H  | 4.23565304839654  | -2.40679126180128 | 1.68677643007006  |
| O  | -0.02016689160263 | -0.13581908617818 | 2.47461540972803  |
| H  | -0.88643891803535 | -0.22471360219746 | 2.90660075485648  |

#### LaFDOTAM<sup>2+</sup>

|   |                   |                   |                   |
|---|-------------------|-------------------|-------------------|
| N | 2.07466999117689  | -0.50477711029888 | -1.70728279757717 |
| C | 2.13081727986299  | 0.53566100924331  | -2.76094738684758 |
| H | 1.40539594085334  | 0.26583764248075  | -3.53635297877929 |
| H | 3.11921324935536  | 0.53748829847043  | -3.25292770179713 |
| C | 1.93329294628607  | -1.84896473387141 | -2.32617269633620 |
| H | 2.22107484977387  | -2.59896473084352 | -1.57959885795626 |
| H | 2.63797881210285  | -1.95984163926428 | -3.16872187211767 |
| C | 3.30281536540612  | -0.47873424293950 | -0.89926187031291 |
| C | 3.13533570193034  | -1.36414989648276 | 0.32330316492801  |
| O | 1.99505684534258  | -1.54851935593145 | 0.81757368648830  |
| N | 4.23426751793182  | -1.90028822609491 | 0.83926168523644  |
| H | 3.47981888826190  | 0.54257816948633  | -0.53261383094299 |
| H | 4.19014498734168  | -0.77662857734099 | -1.48452961821989 |
| N | 0.48228126760313  | 2.05826014296215  | -1.64932281249677 |
| C | -0.53394454316387 | 2.13750785962563  | -2.72488130606621 |
| H | -0.24691147392233 | 1.42804068866911  | -3.50876832596131 |
| H | -0.52420691382364 | 3.13596690848122  | -3.19607118447994 |
| C | 1.84031557116884  | 1.93029990605632  | -2.24030469813450 |
| H | 2.57282622222795  | 2.20031547611766  | -1.47014939996853 |
| H | 1.97040239944214  | 2.65413930549919  | -3.06366000337989 |
| C | 0.43758434187698  | 3.26861105404071  | -0.81589462348815 |
| C | 1.29070476164916  | 3.07369988467387  | 0.42537430523010  |
| O | 1.46839071632963  | 1.92210933817567  | 0.89508684543954  |
| N | 1.80593297772104  | 4.16187086162871  | 0.98384397179542  |

|    |                   |                   |                   |
|----|-------------------|-------------------|-------------------|
| H  | -0.59253296760205 | 3.44018103760614  | -0.47193728379030 |
| H  | 0.75182190885334  | 4.16769549134150  | -1.37406632080747 |
| N  | -2.08164406370726 | 0.46626314933474  | -1.68445005201019 |
| C  | -2.13804596255730 | -0.52598131643588 | -2.78361594877553 |
| H  | -1.41314876187961 | -0.22176128062816 | -3.54667626515076 |
| H  | -3.12671225968207 | -0.50617526442023 | -3.27461786486364 |
| C  | -1.94010608496919 | 1.83698170152658  | -2.24222773521945 |
| H  | -2.22730872950395 | 2.55256791910715  | -1.46243868903194 |
| H  | -2.64516381321569 | 1.98583965230809  | -3.07861136139315 |
| C  | -3.30994543707772 | 0.40409288122300  | -0.87889539931281 |
| C  | -3.14177425667965 | 1.22857976005802  | 0.38539912501412  |
| O  | -2.00075073657004 | 1.39341970162597  | 0.88465974294954  |
| N  | -4.24135953498824 | 1.73315407358949  | 0.93102464316636  |
| H  | -3.48973803703645 | -0.63332778765395 | -0.56224316427940 |
| H  | -4.19635189038703 | 0.73196187419683  | -1.44930573327612 |
| N  | -0.48851105467272 | -2.09645320179894 | -1.74193082346186 |
| C  | 0.52690085739301  | -2.12812306701224 | -2.82075237871935 |
| H  | 0.23925784325820  | -1.38541972429481 | -3.57308258023607 |
| H  | 0.51716717462463  | -3.10513333171999 | -3.33485843602362 |
| C  | -1.84699228591903 | -1.94234264867708 | -2.32557834275176 |
| H  | -2.57873814395367 | -2.24617014863015 | -1.56737147906869 |
| H  | -1.97796337857610 | -2.62916698967136 | -3.17991939903283 |
| C  | -0.44341106307429 | -3.34284946352626 | -0.96341752682223 |
| C  | -1.29609721588437 | -3.20374452403027 | 0.28575691124968  |
| O  | -1.47056028221944 | -2.07480443531726 | 0.80878833969045  |
| N  | -1.81357816248909 | -4.31527741216305 | 0.79369197076532  |
| H  | 0.58681704732327  | -3.52921172968377 | -0.62773803805953 |
| H  | -0.75765783434101 | -4.21621016102468 | -1.56109799039613 |
| La | -0.00241787684315 | -0.06118380278201 | 0.18154720494742  |
| H  | 1.67010508261125  | 5.07973397021724  | 0.57545491370825  |
| H  | 2.32804355469829  | 4.08905584925995  | 1.85195526156169  |
| H  | -5.15020370177150 | 1.60780922856263  | 0.49973893265066  |
| H  | -4.18698532533604 | 2.23624336600456  | 1.81161099066858  |
| H  | -1.67848581606310 | -5.21389431197017 | 0.34434511905649  |
| H  | -2.33523440105290 | -4.28140589146633 | 1.66445876408992  |
| H  | 5.14233607501325  | -1.75754943204909 | 0.41171947558024  |
| H  | 4.18042582487882  | -2.44687890406795 | 1.69358638344285  |
| F  | -0.00085399333623 | -0.10891285948165 | 2.40829333968583  |

### LaDOTPy<sup>3+</sup>

|    |                   |                  |                  |
|----|-------------------|------------------|------------------|
| La | 11.07656347899940 | 5.56710235787422 | 5.11781249250044 |
| C  | 13.12653651625666 | 3.64345320069247 | 2.93214061123983 |
| C  | 9.02070326832890  | 7.50445872106310 | 2.94928417399623 |
| H  | 10.00746955542106 | 7.64567825583251 | 2.50687851433960 |
| C  | 13.16540039018465 | 3.87603037605873 | 7.32391425500396 |
| C  | 8.99428565372046  | 7.24669529791250 | 7.33915385981415 |
| H  | 13.51412312294928 | 3.17923682002138 | 6.55249541195072 |

|   |                   |                   |                  |
|---|-------------------|-------------------|------------------|
| H | 8.64320997594832  | 7.94775029695430  | 6.57268154969004 |
| H | 13.88265230838427 | 3.80592489047386  | 8.15801366697501 |
| H | 8.27971233303119  | 7.31221865580051  | 8.17584662586953 |
| C | 11.78879053099028 | 3.46793408776203  | 7.81777442903591 |
| C | 10.37237717528533 | 7.65200705844609  | 7.83107019282500 |
| N | 10.76336483811538 | 3.45446650351581  | 6.73937891218339 |
| N | 11.39466188380465 | 7.67113919276667  | 6.74979049466725 |
| N | 13.18725976198444 | 5.24731227134038  | 6.74066980854997 |
| N | 8.97057268797448  | 5.87868924149474  | 6.74846492835581 |
| C | 14.40658328717128 | 5.40805454071504  | 5.91154034261546 |
| C | 7.74891881741035  | 5.72249913701958  | 5.92182705303538 |
| H | 14.48577795968452 | 6.46307523651819  | 5.61194039171830 |
| H | 7.66932438136901  | 4.66927339485715  | 5.61605235182070 |
| H | 15.30847941480123 | 5.17781676134006  | 6.50151669744312 |
| H | 6.84852405457222  | 5.94879754790602  | 6.51569573732578 |
| C | 9.52902366332571  | 1.09274662999215  | 4.13648386611139 |
| C | 12.62027179681300 | 10.04655353938346 | 4.15499303307840 |
| H | 12.46023601433297 | 10.99155488920595 | 4.67111329292343 |
| C | 14.38050266859261 | 4.55805594720534  | 4.66698363245368 |
| C | 7.77154831422956  | 6.58008760521699  | 4.68240035154586 |
| N | 13.18065849479417 | 4.36467851385965  | 4.07143341182251 |
| N | 8.96962693441277  | 6.77597614452589  | 4.08408394676260 |
| C | 10.92019898089466 | 2.23592020862960  | 5.90825617000613 |
| C | 11.23525500755664 | 8.89381984988575  | 5.92531087758515 |
| H | 10.69275468200891 | 1.33336132327521  | 6.49843360589470 |
| H | 11.46448352492781 | 9.79333704536566  | 6.51931795776314 |
| H | 11.97376847266021 | 2.15709579849933  | 5.60348858015221 |
| H | 10.18075029404778 | 8.97420766511225  | 5.62420631985408 |
| C | 8.79270081503308  | 1.15622972639126  | 2.95602575257425 |
| C | 13.35332199022911 | 9.98936261042302  | 2.97219208340162 |
| N | 9.86957357995426  | 3.46413695101968  | 4.07392926575212 |
| N | 12.28092871136800 | 7.67528120771795  | 4.08162929431824 |
| C | 15.55255995026938 | 4.02757985981841  | 4.13333908306273 |
| C | 6.59826969401713  | 7.11508299577470  | 4.15601782138681 |
| H | 16.49972917274983 | 4.18741998031329  | 4.64553381742291 |
| C | 8.59427117671744  | 2.39248709003775  | 2.34298571577251 |
| C | 13.55094948289419 | 8.75624063328911  | 2.35258302543495 |
| H | 8.01942286503235  | 2.48743623500580  | 1.42442672780276 |
| C | 9.14252486502530  | 3.51991235263543  | 2.93844541726385 |
| C | 13.00432923324501 | 7.62565991411949  | 2.94351581096289 |
| H | 9.00345177419474  | 4.50828790988000  | 2.49896255911770 |
| C | 14.25501166476662 | 3.09944095136129  | 2.33480866919741 |
| C | 7.89088736640918  | 8.05390616159189  | 2.35948471119793 |
| H | 7.98218933467907  | 8.63100094165393  | 1.44196296605491 |
| C | 12.76503942244365 | 7.64680268949874  | 7.33501567635442 |
| C | 9.39460160508925  | 3.47598679454666  | 7.32845471203554 |
| H | 13.46301452227889 | 7.99889354998819  | 6.56620318512873 |
| H | 8.69449937703563  | 3.12808966370471  | 6.55966340614252 |

|   |                   |                   |                  |
|---|-------------------|-------------------|------------------|
| H | 12.83381163658512 | 8.36042208507225  | 8.17231442924064 |
| H | 9.32794864230475  | 2.75798942480755  | 8.16209496098967 |
| C | 13.17241002068750 | 6.26808335577741  | 7.82348593088140 |
| C | 8.98861630449974  | 4.85201234321709  | 7.82556712464085 |
| C | 15.49075172593513 | 3.29714576847775  | 2.94916250710326 |
| C | 6.65695200037465  | 7.85330548018541  | 2.97650002931044 |
| C | 10.06413398746285 | 2.26368568697315  | 4.66789923201090 |
| C | 12.08752319018471 | 8.87262099639323  | 4.68221012155667 |
| H | 11.85777937511163 | 2.47425277786539  | 8.29025015657305 |
| H | 11.44527597698081 | 4.15618495808501  | 8.59820362052314 |
| H | 10.30490988490420 | 8.64313476760421  | 8.30908564590160 |
| H | 10.71811090021371 | 6.95953190957436  | 8.60676402087718 |
| H | 12.48308197763364 | 5.92125712716777  | 8.60148966875363 |
| H | 14.16545942500918 | 6.33495683999650  | 8.29757497960215 |
| H | 7.99694804814815  | 4.78241116581704  | 8.30217184306879 |
| H | 9.68014941182521  | 5.19461857454408  | 8.60348838881490 |
| H | 13.14354506120887 | 6.63945148076922  | 2.49924728730418 |
| H | 14.12384770376799 | 8.66612730400803  | 1.43232164784168 |
| H | 13.77488993515336 | 10.89761061210251 | 2.54409343512472 |
| H | 16.39750667459314 | 2.87766658402658  | 2.51587886358935 |
| H | 14.16135469940265 | 2.52868355470652  | 1.41357288363794 |
| H | 12.13839994139786 | 3.50392003965652  | 2.49228487453971 |
| H | 5.74929066378440  | 8.27702690673467  | 2.54928208276657 |
| H | 5.65263172436666  | 6.95288623669057  | 4.67029459644373 |
| H | 8.36973189011365  | 0.25031239191438  | 2.52438160678098 |
| H | 9.69019234993415  | 0.14505440253894  | 4.64729281482918 |

**La(H<sub>2</sub>O)DOTPy<sup>3+</sup>**

|    |                   |                  |                  |
|----|-------------------|------------------|------------------|
| La | 11.07486242399389 | 5.56555913770354 | 4.97813783001354 |
| O  | 11.06940062174709 | 5.56980971452092 | 2.33451834999635 |
| C  | 13.24341073634480 | 3.42513249558474 | 3.02542189023898 |
| C  | 8.89980532815029  | 7.71690525737310 | 3.04384591591580 |
| H  | 9.87122974539153  | 7.91117012185428 | 2.59078003000480 |
| C  | 13.17673604821500 | 3.89992335576836 | 7.27508274116479 |
| C  | 8.98130908281442  | 7.22167995825734 | 7.29255804063695 |
| H  | 13.54532580461080 | 3.19972738145548 | 6.51708198242679 |
| H  | 8.60861706937665  | 7.92583996835442 | 6.54027486295081 |
| H  | 13.88295985319288 | 3.84805994207230 | 8.12033549242365 |
| H  | 8.27943883331865  | 7.26881870605245 | 8.14183002064441 |
| C  | 11.80174407985048 | 3.47882553877262 | 7.75210344294158 |
| C  | 10.35859749398526 | 7.64078165177178 | 7.76492630136076 |
| N  | 10.78371248556820 | 3.46039442429625 | 6.66806863661465 |
| N  | 11.37205029964493 | 7.66329227638434 | 6.67672456376024 |
| N  | 13.18465071696598 | 5.26673147280147 | 6.68237872070567 |
| N  | 8.97109973145873  | 5.85811773038984 | 6.69264499918941 |
| C  | 14.41821535825680 | 5.43564711718007 | 5.87900299819763 |
| C  | 7.73495159270244  | 5.69362990241854 | 5.89202110014768 |

|   |                   |                   |                  |
|---|-------------------|-------------------|------------------|
| H | 14.47067149085428 | 6.47818285502449  | 5.53483206892871 |
| H | 7.68282934655034  | 4.65361951563188  | 5.54023931942157 |
| H | 15.31295919469710 | 5.25981008251816  | 6.49939125664813 |
| H | 6.84205830442396  | 5.86376233127018  | 6.51644861234993 |
| C | 9.55473160874876  | 1.03518620380587  | 4.12052194522905 |
| C | 12.58823600457897 | 10.09902900532573 | 4.13223965817697 |
| H | 12.31371661937769 | 11.03974825714006 | 4.60658360402060 |
| C | 14.44187115901869 | 4.51990564675800  | 4.68460220802994 |
| C | 7.70715709693680  | 6.61835359710593  | 4.70474133360723 |
| N | 13.25686282754479 | 4.25179718876235  | 4.09119622391862 |
| N | 8.88924448669249  | 6.88303459254170  | 4.10385776309233 |
| C | 10.95355259275897 | 2.24313671847236  | 5.84017945898131 |
| C | 11.19903299842536 | 8.88394870999081  | 5.85444191172997 |
| H | 10.77985089231524 | 1.33536118837608  | 6.44200969290721 |
| H | 11.37561880771551 | 9.78917123119858  | 6.45916774653265 |
| H | 11.99695754185958 | 2.19819984063729  | 5.49652856122255 |
| H | 10.15422280658465 | 8.93048221075094  | 5.51530381616962 |
| C | 8.71354866034103  | 1.06610491535899  | 3.01250137590696 |
| C | 13.42429357948235 | 10.07292026380911 | 3.02020029768911 |
| N | 9.71371072742939  | 3.42854278351734  | 4.09933420424762 |
| N | 12.43270422232162 | 7.70562349404929  | 4.10385756691847 |
| C | 15.63904002443963 | 3.98430292819546  | 4.21313085611440 |
| C | 6.51012314741456  | 7.16622629865236  | 4.24747099107668 |
| H | 16.57243558020201 | 4.21920787457488  | 4.72201419095298 |
| C | 8.35355007400787  | 2.29885695651785  | 2.46860357085959 |
| C | 13.78209890319383 | 8.84259742896078  | 2.46939315613292 |
| H | 7.67840058598980  | 2.37301471514265  | 1.61885094479465 |
| C | 8.87172466232078  | 3.44951985711903  | 3.04492215480356 |
| C | 13.26827499273334 | 7.68929418891712  | 3.04430806451077 |
| H | 8.59428012926741  | 4.43472005332711  | 2.66563536157560 |
| C | 14.39357271643531 | 2.85074846043237  | 2.50177804092658 |
| C | 7.74938986723441  | 8.30339791410496  | 2.53405058738572 |
| H | 7.81506177338024  | 8.97286734880617  | 1.67892377439934 |
| C | 12.73786860973992 | 7.65893596385317  | 7.27276943071874 |
| C | 9.42012905751005  | 3.46259279894932  | 7.26944451553835 |
| H | 13.44203931234625 | 8.01724194757725  | 6.51389730463340 |
| H | 8.71288349446538  | 3.10821156192062  | 6.51162420296953 |
| H | 12.78751536675731 | 8.37323894488865  | 8.11119394062570 |
| H | 9.37342187049966  | 2.74431750817276  | 8.10466812396652 |
| C | 13.15034302516180 | 6.28523242807754  | 7.76428170666756 |
| C | 9.00949570850877  | 4.83396770683405  | 7.76907663475880 |
| C | 15.61637367827806 | 3.14438413942740  | 3.10330958011254 |
| C | 6.52959401603669  | 8.01424068351058  | 3.14371782902090 |
| C | 10.03842803517963 | 2.23405321064234  | 4.64300658195150 |
| C | 12.10864359740861 | 8.89779036954912  | 4.65294934761414 |
| H | 11.87302155722456 | 2.48370327437859  | 8.22236361855455 |
| H | 11.44688576762006 | 4.16157901465769  | 8.53194380413423 |
| H | 10.28933927095060 | 8.63406501432719  | 8.23936300912854 |

|   |                   |                   |                  |
|---|-------------------|-------------------|------------------|
| H | 10.71662895226493 | 6.95495882478222  | 8.54058671886990 |
| H | 12.45526957329731 | 5.93358492481754  | 8.53478777406393 |
| H | 14.13802690726145 | 6.35807463610849  | 8.24981894247611 |
| H | 8.02353879988178  | 4.75827470557439  | 8.25768666542275 |
| H | 9.70717624721020  | 5.18197933464686  | 8.53888396084267 |
| H | 10.50435429097251 | 5.04415931748887  | 1.74172869607892 |
| H | 13.54411327291921 | 6.70574843511359  | 2.65956733033619 |
| H | 14.45217872046180 | 8.77239438306634  | 1.61531723616168 |
| H | 13.80747755179180 | 11.00117821500392 | 2.59903756179421 |
| H | 16.54093023887637 | 2.71453588275660  | 2.72036926977381 |
| H | 14.32565347157474 | 2.18742945977714  | 1.64203239689624 |
| H | 12.26964222667985 | 3.22729177690644  | 2.57901393646066 |
| H | 5.60523121729728  | 8.45463204332317  | 2.77246749676861 |
| H | 5.57944915801244  | 6.93420452115154  | 4.76261155144769 |
| H | 8.32861198987091  | 0.13966783966178  | 2.58896624789988 |
| H | 9.83153020613354  | 0.09246769706244  | 4.58955173352947 |
| H | 11.63467407694097 | 6.09479262618475  | 1.74124461218648 |

**La(OH)DOTPy<sup>2+</sup>**

|    |                   |                   |                  |
|----|-------------------|-------------------|------------------|
| La | 11.09779290719765 | 5.54764047373895  | 4.78551339704643 |
| O  | 11.17116120732864 | 5.56341067275132  | 2.53514677398550 |
| C  | 13.35712980410965 | 3.27745611758693  | 3.04189495046476 |
| C  | 8.84398098193869  | 7.63878305690642  | 2.93532663810681 |
| H  | 9.81268113637701  | 7.75813713489558  | 2.44942202618149 |
| C  | 13.16564204827492 | 3.87188606791742  | 7.22697510244888 |
| C  | 9.01011768092472  | 7.23314917670747  | 7.22028205222643 |
| H  | 13.51982288887098 | 3.16004022683838  | 6.47350609933793 |
| H  | 8.66706569817123  | 7.94290018136331  | 6.45834119062941 |
| H  | 13.86645895569269 | 3.80483837175473  | 8.07800497492148 |
| H  | 8.29969335291181  | 7.31001069610396  | 8.06268921611748 |
| C  | 11.78056723353678 | 3.47536173394725  | 7.70295671288678 |
| C  | 10.39186890817659 | 7.62534016450731  | 7.70858390112449 |
| N  | 10.76606936975628 | 3.43519027520873  | 6.62166291799620 |
| N  | 11.40901789001111 | 7.67736627497638  | 6.63132501044101 |
| N  | 13.20831219839888 | 5.23288322656499  | 6.63103410237985 |
| N  | 8.96239399270610  | 5.87079281849082  | 6.62917650531619 |
| C  | 14.45440119674914 | 5.38502284545163  | 5.85340877575594 |
| C  | 7.70706390608520  | 5.72601446342554  | 5.86320141859964 |
| H  | 14.51739767290580 | 6.42398562295829  | 5.49666875429007 |
| H  | 7.62789610399503  | 4.68381985203499  | 5.52031586462196 |
| H  | 15.34081491559717 | 5.21695720921275  | 6.49111581169624 |
| H  | 6.82879072751591  | 5.91817427794463  | 6.50478269301282 |
| C  | 9.44686779859512  | 0.94060330741983  | 4.20631594714058 |
| C  | 12.74902168051808 | 10.18499290959141 | 4.25142542067376 |
| H  | 12.55139571822239 | 11.10402336984520 | 4.80151436498881 |
| C  | 14.50999126295404 | 4.45870796415920  | 4.66487011143691 |
| C  | 7.66658120681064  | 6.63392773206476  | 4.66172921589431 |

|   |                   |                   |                  |
|---|-------------------|-------------------|------------------|
| N | 13.33743200769614 | 4.10383198453295  | 4.10407528051408 |
| N | 8.83579783617458  | 6.85379753206924  | 4.02868089203416 |
| C | 10.91712461635484 | 2.18822554638734  | 5.84185782175103 |
| C | 11.25773203771421 | 8.93332416976547  | 5.86705539227802 |
| H | 10.74205839143886 | 1.30184085235550  | 6.47704338412790 |
| H | 11.43495096877840 | 9.81188529935770  | 6.51242833155072 |
| H | 11.95624998972234 | 2.12579051034618  | 5.48727238285945 |
| H | 10.21783075662121 | 9.00212339494231  | 5.51483199856560 |
| C | 8.60427097119167  | 0.94776608756500  | 3.09822505792973 |
| C | 13.57646981181515 | 10.18047187501112 | 3.13123335081797 |
| N | 9.72970134237300  | 3.31659080395142  | 4.03733467157296 |
| N | 12.39795537665453 | 7.82285892963518  | 4.02884546670756 |
| C | 15.73473178482577 | 4.00929851370135  | 4.16691845992291 |
| C | 6.46952231588509  | 7.19554732775593  | 4.21631599762587 |
| H | 16.66152441317882 | 4.31643138301067  | 4.64990825289083 |
| C | 8.32043405007806  | 2.16070051278771  | 2.47096925128374 |
| C | 13.81028611363924 | 8.97700944749352  | 2.46672480474239 |
| H | 7.65726049152365  | 2.21421496967819  | 1.60961025099702 |
| C | 8.90621349433176  | 3.31699395746218  | 2.97156294608637 |
| C | 13.19623367022689 | 7.82507869719445  | 2.94510632380245 |
| H | 8.72453646653577  | 4.28906888366130  | 2.51070745040481 |
| C | 14.53138707222089 | 2.77955091168034  | 2.49237921097297 |
| C | 7.69576230590356  | 8.24121018996275  | 2.43452981532029 |
| H | 7.75312503758139  | 8.87485508355271  | 1.55122903988561 |
| C | 12.77107007995295 | 7.63314917189872  | 7.22324812533719 |
| C | 9.40370236054231  | 3.47342837076121  | 7.21509837623760 |
| H | 13.48060069769209 | 7.98041163968569  | 6.46302127892746 |
| H | 8.69371474024656  | 3.12963721807496  | 6.45413109885135 |
| H | 12.84550616565067 | 8.34140533957596  | 8.06770766680141 |
| H | 9.33245281229680  | 2.76060553022529  | 8.05572701105353 |
| C | 13.16649671591679 | 6.25089774200555  | 7.70808149506539 |
| C | 9.00752460366521  | 4.85310580338476  | 7.70582183495412 |
| C | 15.74571409138669 | 3.16295433827771  | 3.06283747407515 |
| C | 6.48476443091003  | 8.00958226983159  | 3.08665889855224 |
| C | 9.99211032001769  | 2.14512573179532  | 4.65247436951017 |
| C | 12.17661723255526 | 8.98534706560785  | 4.67458281565470 |
| H | 11.84553483643728 | 2.49262519596284  | 8.20311354359729 |
| H | 11.43063486845388 | 4.18089097570915  | 8.46447959784687 |
| H | 10.32345325453682 | 8.60317147746782  | 8.21798384513723 |
| H | 10.73791979517229 | 6.91289504801054  | 8.46538767090069 |
| H | 12.45997485333831 | 5.90459000174983  | 8.47037930947209 |
| H | 14.14849174262877 | 6.31878672191440  | 8.20946588906982 |
| H | 8.02691460517981  | 4.78281325645299  | 8.20956512022637 |
| H | 9.71538931233787  | 5.19821624136487  | 8.46731916435875 |
| H | 10.99918269010495 | 4.82132216833569  | 1.93547676418161 |
| H | 13.31332809185826 | 6.86136469429510  | 2.44836649342976 |
| H | 14.45463549272785 | 8.92785875624178  | 1.59069570953468 |
| H | 14.03843565606607 | 11.10472346057784 | 2.78545951599519 |

|   |                   |                  |                  |
|---|-------------------|------------------|------------------|
| H | 16.68912650727708 | 2.79782193325699 | 2.65829007165233 |
| H | 14.49178559474787 | 2.10771374113692 | 1.63692461030773 |
| H | 12.38661980848549 | 3.01269449941268 | 2.62099670750722 |
| H | 5.56296019629800  | 8.46273979794449 | 2.72320458233505 |
| H | 5.54425128472882  | 6.99963907718242 | 4.75651857815646 |
| H | 8.16541466219294  | 0.01908659293756 | 2.73509104372325 |
| H | 9.67669272979651  | 0.01476305069285 | 4.73186555318063 |

**LaFDOTPy<sup>2+</sup>**

|    |                   |                   |                  |
|----|-------------------|-------------------|------------------|
| La | 11.08869366245193 | 5.55285035445206  | 4.82377873447473 |
| F  | 11.08813782051825 | 5.55298026234736  | 2.60707946098813 |
| C  | 13.31714436624478 | 3.45581274318621  | 2.94164593068923 |
| C  | 8.85926975995344  | 7.65019124282443  | 2.94310439508871 |
| H  | 12.34706713894486 | 3.31842651165574  | 2.46336881301308 |
| H  | 9.82901403619268  | 7.78726314601293  | 2.46406255399809 |
| C  | 13.16311710287831 | 3.86377331310727  | 7.23039831970305 |
| C  | 9.01552184895477  | 7.24166417753076  | 7.23167088331292 |
| H  | 13.50588187233975 | 3.15448588834263  | 6.46799615195168 |
| H  | 8.67234260664696  | 7.95104208199719  | 6.46953931228360 |
| H  | 13.87437327040872 | 3.78844550398574  | 8.07179346710640 |
| H  | 8.30471828794481  | 7.31688587230068  | 8.07346098235978 |
| C  | 11.78119703514382 | 3.47193629076025  | 7.71898545115491 |
| C  | 10.39770309842711 | 7.63344810186942  | 7.71956821453688 |
| N  | 10.76348989096860 | 3.43145609109704  | 6.64082010836353 |
| N  | 11.41484458173984 | 7.67405209756671  | 6.64087914623495 |
| N  | 13.20842367343468 | 5.22709568476743  | 6.63905669230037 |
| N  | 8.96990019390482  | 5.87841293129805  | 6.64018633883322 |
| C  | 14.46071146811468 | 5.37303747873577  | 5.86587453364010 |
| C  | 7.71720603768630  | 5.73256096600885  | 5.86765612151120 |
| H  | 14.53712648522535 | 6.41516308271468  | 5.52210752682702 |
| H  | 7.64058160353202  | 4.69046592469474  | 5.52384095631856 |
| H  | 15.34148295028654 | 5.18263854320031  | 6.50409298075909 |
| H  | 6.83677736202025  | 5.92292319736242  | 6.50635742987281 |
| C  | 9.44975039857427  | 0.94411278344805  | 4.21171074859359 |
| C  | 12.72751571666740 | 10.16159607742935 | 4.21144200174549 |
| H  | 9.64764969803303  | 0.01755266702563  | 4.74884087634375 |
| H  | 12.52988876977006 | 11.08810808584381 | 4.74875463132862 |
| C  | 14.49806228034423 | 4.46545159409981  | 4.66371335772218 |
| C  | 7.67922838857130  | 6.64022787336356  | 4.66558792633388 |
| N  | 13.32581243445373 | 4.23762377272301  | 4.03752183526588 |
| N  | 8.85117209277745  | 6.86818108705075  | 4.03884306745353 |
| C  | 10.90883691003756 | 2.17863987167925  | 5.86878661170141 |
| C  | 11.26912058826584 | 8.92694441685514  | 5.86903930447618 |
| H  | 10.71662720536366 | 1.29840111360626  | 6.50728373101178 |
| H  | 11.46163096024894 | 9.80712044727826  | 6.50753152639127 |
| H  | 11.95124758657297 | 2.10087396357433  | 5.52628644843510 |
| H  | 10.22655047851011 | 9.00474328228126  | 5.52703146274698 |

|   |                   |                   |                  |
|---|-------------------|-------------------|------------------|
| C | 8.64248385447666  | 0.95984082937165  | 3.07720965140037 |
| C | 13.53424104675014 | 10.14596413358595 | 3.07655349813096 |
| H | 8.19675385923195  | 0.03716859000214  | 2.70703543739473 |
| H | 13.97979233047800 | 11.06866767660999 | 2.70624198136067 |
| N | 9.77754194718329  | 3.31333442526936  | 4.03771297690558 |
| N | 12.39951687991331 | 7.79241350526451  | 4.03731576763037 |
| C | 15.69549049346770 | 3.91265621924278  | 4.21003818371232 |
| C | 6.48155835696206  | 7.19299316573697  | 4.21253468128520 |
| H | 16.62235944955646 | 4.11248026741490  | 4.74590597455140 |
| C | 8.40732600711159  | 2.17208780092957  | 2.42922328664561 |
| C | 13.76899876273086 | 8.93378832441159  | 2.42829099584441 |
| H | 7.77858994473730  | 2.23004050000796  | 1.54258213335224 |
| H | 14.39720756799405 | 8.87592412300065  | 1.54127075925806 |
| C | 8.99745533285166  | 3.32180970501894  | 2.94051193244630 |
| C | 13.17911066058394 | 7.78402441951976  | 2.93976529135629 |
| H | 8.86254890702688  | 4.29153786385151  | 2.46082350430087 |
| H | 13.31366091291611 | 6.81436385520414  | 2.45983975608387 |
| C | 14.46693397055341 | 2.86550710986504  | 2.43067124370851 |
| C | 7.70910154185052  | 8.23998834236906  | 2.43239319269950 |
| H | 14.40877025326403 | 2.23477374585802  | 1.54546921337947 |
| H | 7.76671876300753  | 8.87040343236032  | 1.54692771650477 |
| C | 12.77837469827784 | 7.62694608571012  | 7.23114301415061 |
| C | 9.40025879509081  | 3.47849393730155  | 7.23178038816853 |
| H | 13.48737226239571 | 7.96995926989159  | 6.46853611357175 |
| H | 8.69087638887945  | 3.13557129222305  | 6.46949036293705 |
| H | 12.85521277829993 | 8.33719999425890  | 8.07327880967775 |
| H | 9.32384645736849  | 2.76813932034543  | 8.07386985388723 |
| C | 13.16917448493653 | 6.24419392827665  | 7.71804166521317 |
| C | 9.00971627611452  | 4.86119033457043  | 7.71903674645087 |
| C | 15.67955246019671 | 3.10331359920522  | 3.07697724097377 |
| C | 6.49684845582063  | 8.00227304931718  | 3.07942876899894 |
| H | 16.60236532898132 | 2.65788610613750  | 2.70678533650104 |
| H | 5.57381119743396  | 8.44753214533857  | 2.70961059642767 |
| C | 10.00293446839493 | 2.14140513436027  | 4.66536470892813 |
| C | 12.17446519785875 | 8.96428344850105  | 4.66520302548985 |
| H | 11.84720540726912 | 2.49019687178952  | 8.22053570419325 |
| H | 11.43753462432808 | 4.17977119052075  | 8.48122844139515 |
| H | 10.33196398716823 | 8.61512565189132  | 8.22127522936928 |
| H | 10.74176920384298 | 6.92551572117516  | 8.48153654571154 |
| H | 12.46104761516741 | 5.90041154098513  | 8.47995458190720 |
| H | 14.15108982740343 | 6.30861115706256  | 8.21941520942945 |
| H | 8.02806818382375  | 4.79672038746730  | 8.22092627042099 |
| H | 9.71824786352749  | 5.20488678825585  | 8.48061094464867 |
| H | 5.55498353261862  | 6.99298648644289  | 4.74881522872493 |

**LaMacropa<sup>+</sup>**

|    |                   |                  |                   |
|----|-------------------|------------------|-------------------|
| La | -0.00009691637864 | 0.57409511469031 | -0.00015327971335 |
|----|-------------------|------------------|-------------------|

|   |                   |                   |                   |
|---|-------------------|-------------------|-------------------|
| O | -0.33029783872947 | -0.62560982030118 | 2.10028324544862  |
| O | 0.33002974818397  | -0.62670278063228 | -2.10025098356976 |
| O | -1.72725295436999 | 1.97543235528319  | -1.51892687192563 |
| O | -0.99427164900245 | 2.26596863173375  | 1.99709749759441  |
| O | 1.72694752985920  | 1.97526299103298  | 1.51912470488173  |
| O | 0.99347282427381  | 2.26672978955446  | -1.99708869175474 |
| N | -2.86196227237765 | 0.54066216356201  | 0.64128434284455  |
| N | 2.86195558045350  | 0.54178460455903  | -0.64201038569451 |
| N | -1.55689467503653 | -1.54102248182490 | -0.53711475761229 |
| N | 1.55717890355735  | -1.53935269369056 | 0.53694974086032  |
| O | -0.53157039948203 | -2.58062865784802 | 3.20795240972728  |
| O | 0.53438843525241  | -2.58285398442219 | -3.20542964439986 |
| C | -3.60750964630460 | 0.80177931620085  | -0.61008393533339 |
| C | -3.14824141619581 | 2.06490322916993  | -1.29622195275629 |
| C | -3.24678259059186 | 1.53132421278689  | 1.67117640855038  |
| C | -2.16135498029843 | 1.76275760423727  | 2.68718903573668  |
| C | -0.02014517699981 | 2.70719557939379  | 2.95901456493709  |
| C | 1.22376238216791  | 3.12338948579111  | 2.23409450180599  |
| C | 0.01933836290771  | 2.70888252577312  | -2.95853665311406 |
| C | -1.22445505591904 | 3.12419051579664  | -2.23315898925725 |
| C | 3.24637052087995  | 1.53263083534645  | -1.67196014651928 |
| C | 2.16060692593966  | 1.76412850548512  | -2.68769225394163 |
| C | 3.14777403868059  | 2.06571851588635  | 1.29560638250347  |
| C | 3.60755069012719  | 0.80284446454373  | 0.60932038167673  |
| C | -3.16303291291167 | -0.81998307867341 | 1.12844950480508  |
| C | 3.16312692617585  | -0.81873632963789 | -1.12926348927474 |
| C | 2.61462163719562  | -1.88059815425226 | -0.21520438506174 |
| C | -2.61459250518194 | -1.88202861206323 | 0.21461915306928  |
| C | 1.06544087373623  | -2.41380865592239 | 1.43444240000034  |
| C | 1.56478307698164  | -3.70595149582365 | 1.55914125760106  |
| C | 2.63069712291857  | -4.08557125209501 | 0.74275358867276  |
| C | 3.18066105698317  | -3.15606441492244 | -0.13577400386211 |
| C | -3.18030325710795 | -3.15767013470100 | 0.13560208972293  |
| C | -2.63014130853059 | -4.08727436304834 | -0.74270010765632 |
| C | -1.56382962918483 | -3.70785724493783 | -1.55861469962513 |
| C | -1.06472498224223 | -2.41563850633231 | -1.43404616673736 |
| H | -4.25223901897023 | -0.96526168390170 | 1.24946997086011  |
| H | -2.69951971647908 | -0.93532524552212 | 2.11849937887087  |
| H | 4.25230638900830  | -0.96406128444765 | -1.25057553385063 |
| H | 2.69935233080401  | -0.93408570813650 | -2.11919429882410 |
| H | 1.12915656880639  | -4.38121146117287 | 2.29281614974618  |
| H | 3.04833638477133  | -5.08949239884034 | 0.81127699308985  |
| H | 4.04439930210720  | -3.40608145578298 | -0.75045358494329 |
| H | -4.04375073174798 | -3.40784348075511 | 0.75062116328168  |
| H | -3.04745230588191 | -5.09135920018889 | -0.81089292975271 |
| H | -1.12806079023469 | -4.38308759582212 | -2.29217151228018 |
| C | -0.02749715156857 | -1.85701868266623 | 2.32845251841396  |
| C | 0.02806162949364  | -1.85848429468307 | -2.32786386839124 |

|   |                   |                   |                   |
|---|-------------------|-------------------|-------------------|
| H | -4.69423906236454 | 0.87554710015195  | -0.42059700897638 |
| H | -3.66016964124749 | 2.15731056775581  | -2.26603670683747 |
| H | -3.36424230487729 | 2.97232743869459  | -0.71156262694937 |
| H | 4.69423046992054  | 0.87712042666857  | 0.41973840868590  |
| H | 3.44657648615733  | -0.04376403153948 | 1.28672384274692  |
| H | 3.66018274556886  | 2.15861529318870  | 2.26511928291878  |
| H | 3.36280180712589  | 2.97323056975011  | 0.71071379347308  |
| H | 1.88035368106306  | 0.84478429329947  | -3.22271899524562 |
| H | 2.49823821479419  | 2.51732041193359  | -3.41604217656192 |
| H | 3.46027833432880  | 2.48665476605078  | -1.17814050739079 |
| H | 4.17161450887745  | 1.22341025681282  | -2.18963348200676 |
| H | -2.49940586410864 | 2.51560580894174  | 3.41569953350432  |
| H | -1.88095782673393 | 0.84333070673027  | 3.22201939543369  |
| H | -4.17204734780490 | 1.22186235075845  | 2.18866712804113  |
| H | -3.46082105341025 | 2.48539189722717  | 1.17749662516704  |
| H | -1.03329396094650 | 3.94508723728727  | -1.52325518250411 |
| H | -1.97044377318818 | 3.45993505372389  | -2.96761901841406 |
| H | -0.20402870231444 | 1.88382796625309  | -3.65456375590469 |
| H | 0.42142138655560  | 3.56107850566123  | -3.52893437620078 |
| H | -3.44612370109985 | -0.04462061948638 | -1.28763293580224 |
| H | 1.96952260094930  | 3.45860108812877  | 2.96903956252027  |
| H | 1.03264264184275  | 3.94486748653184  | 1.52484391776883  |
| H | -0.42227054616203 | 3.55880464832219  | 3.53026099124938  |
| H | 0.20321254753706  | 1.88146048937511  | 3.65423403243513  |

### La(H<sub>2</sub>O)Macropa<sup>+</sup>

|    |                   |                   |                   |
|----|-------------------|-------------------|-------------------|
| La | 12.13548765522184 | 8.59142284057583  | 5.47102883290005  |
| O  | 14.94007291629478 | 8.70510288519109  | 5.37648707727339  |
| O  | 9.98326866583254  | 9.90345986615250  | 4.24367504129680  |
| H  | 13.37127626933476 | 10.14544559417767 | 2.90633178697739  |
| O  | 13.58756067594259 | 7.84139886930426  | 3.04359174150209  |
| O  | 12.87570636384187 | 6.25795447405030  | 5.32018071965907  |
| O  | 9.28192689258227  | 8.42558797727479  | 9.01726375800578  |
| O  | 10.57552880052442 | 9.08395346997461  | 7.29202931620839  |
| N  | 10.04890883945065 | 6.92597110056418  | 5.89131721098707  |
| O  | 12.91630256197164 | 4.14785786568175  | 6.11336049755494  |
| N  | 13.59106312008390 | 9.95485341572376  | 7.63685471589947  |
| N  | 12.90445892674220 | 7.31075017275595  | 7.72584670088013  |
| C  | 9.43688833511039  | 7.96306509479620  | 2.96439085291101  |
| H  | 8.71440796869285  | 7.71297725549376  | 3.75039965289818  |
| H  | 9.01342901802358  | 7.61815250896012  | 2.00353792196884  |
| N  | 10.70892993293604 | 7.26063830415834  | 3.25647624777809  |
| C  | 12.95573167914273 | 6.81773741117531  | 2.25615143694783  |
| H  | 13.04697652927110 | 5.85672631507905  | 2.78532918953940  |
| H  | 13.47267793185472 | 6.73301807914078  | 1.28652665873956  |
| C  | 13.11239126446499 | 7.19316960204666  | 10.10405896096004 |
| H  | 13.22025146602659 | 7.71547225645895  | 11.05384467609559 |

|   |                   |                   |                   |
|---|-------------------|-------------------|-------------------|
| C | 15.60408580731026 | 8.56759037532468  | 4.10918025169032  |
| H | 15.56677965452398 | 9.52643757197044  | 3.56546114540730  |
| C | 12.98444486242407 | 5.17314068944592  | 8.80791133938461  |
| H | 12.98142556446849 | 4.08962336316180  | 8.70794991139822  |
| C | 14.94773191803374 | 7.47111851569959  | 3.32470525248940  |
| H | 15.49640230922977 | 7.32465319920996  | 2.38012106332453  |
| H | 14.95113433806586 | 6.52833694669003  | 3.89467094450770  |
| C | 15.58830054832079 | 9.71311445628643  | 6.17116402624002  |
| C | 15.03803724285136 | 9.64040469710013  | 7.57153587809673  |
| H | 15.18797783577155 | 8.61981104034544  | 7.94334179759786  |
| C | 12.91701917783043 | 5.96654327029214  | 7.66639789390980  |
| C | 9.78979503141358  | 8.26197401050343  | 7.88949019417456  |
| C | 8.86973807201937  | 4.88829734674574  | 5.47517945081858  |
| H | 8.63387221895187  | 4.07568940106878  | 4.78919097865187  |
| C | 11.51813667372827 | 7.20230506265259  | 2.01930954316354  |
| H | 11.49482787081762 | 8.19402277464459  | 1.54956019693679  |
| H | 11.07282619924225 | 6.49127908277026  | 1.29857659802078  |
| C | 12.89556975293803 | 5.38639459969069  | 6.26340504816293  |
| C | 10.39969577540865 | 5.89419198665856  | 3.72200585277904  |
| H | 11.34074727151129 | 5.33390202608573  | 3.80168149464648  |
| H | 9.75020148692189  | 5.36677247955904  | 2.99932467579380  |
| C | 13.04800371772207 | 9.42694757773848  | 8.90426360268934  |
| H | 13.62963831761024 | 9.79630874082321  | 9.76885107523477  |
| H | 12.01570769663744 | 9.78490024228871  | 9.01469212496070  |
| C | 9.74708618985562  | 5.90137853102642  | 5.07791186569351  |
| C | 8.59348143439298  | 6.02805893706394  | 7.57229457237840  |
| H | 8.15351406720282  | 6.13537444400744  | 8.56167842143947  |
| C | 9.59270578082319  | 9.46102452798011  | 2.93226309038805  |
| H | 10.34079179866150 | 9.79861845934162  | 2.19517176552985  |
| H | 8.62675226611757  | 9.91878796223705  | 2.66661456365093  |
| C | 13.07109318526951 | 5.80256243374181  | 10.04922066963916 |
| H | 13.12962299591235 | 5.21459037752178  | 10.96466377525830 |
| C | 13.02188518383397 | 7.92230652925766  | 8.91499132326127  |
| C | 9.46335751433606  | 7.00679199745134  | 7.10059729390654  |
| C | 8.30273515485777  | 4.94360073238574  | 6.74538193637901  |
| H | 7.62378082938543  | 4.15950515090211  | 7.07898066263559  |
| O | 11.62660392673646 | 11.39981452638858 | 5.99186134373395  |
| O | 12.97106468130076 | 10.40030114015192 | 3.75565339160566  |
| C | 9.90777364676553  | 11.33605999619338 | 4.32914471535492  |
| C | 13.41677084168425 | 11.42254983654515 | 7.58287560173705  |
| H | 16.66101187897425 | 8.30539118733035  | 4.27688951970076  |
| H | 15.43837480485660 | 10.70004224908232 | 5.70185968543248  |
| H | 16.67123606935440 | 9.51367061643836  | 6.19930674118365  |
| H | 15.61337287614334 | 10.31970338877542 | 8.22660643510432  |
| C | 10.26397523350560 | 11.76556279913167 | 5.72060628959306  |
| C | 11.99909688638545 | 11.85084701499839 | 7.30501192264111  |
| H | 12.91405820936679 | 11.36959893452260 | 3.78758865580213  |
| H | 8.87977120484289  | 11.66250687019804 | 4.10348013435640  |

|   |                   |                   |                  |
|---|-------------------|-------------------|------------------|
| H | 10.58517300147065 | 11.78823705340411 | 3.58528534362340 |
| H | 13.75187700427956 | 11.88802049343739 | 8.52861425914653 |
| H | 14.06091615253790 | 11.81312073275498 | 6.78469556780073 |
| H | 9.60697045843992  | 11.27819828597390 | 6.45881456315797 |
| H | 10.14885831233637 | 12.85884767301862 | 5.80129194397539 |
| H | 11.28864742363407 | 11.43834079518551 | 8.03809578959177 |
| H | 11.93962482963714 | 12.95077950806008 | 7.34237181923581 |

**La(OH)Macropa**

|    |                   |                   |                   |
|----|-------------------|-------------------|-------------------|
| La | 12.20998551095127 | 8.62070980254255  | 5.38042995731878  |
| O  | 15.04847821965605 | 8.56998866847044  | 5.40155538250155  |
| O  | 9.90688346013559  | 9.91719704685778  | 4.29424883088850  |
| H  | 11.86383001297195 | 12.97365110593348 | 7.48989983202683  |
| O  | 13.63814608235895 | 7.69416401617680  | 3.03645320935370  |
| O  | 12.88157223608905 | 6.17961041075983  | 5.31309689275510  |
| O  | 9.29971783270650  | 8.41057667838715  | 8.99732432182054  |
| O  | 10.61521017053484 | 9.08108969416893  | 7.29246246840564  |
| N  | 10.01859822610306 | 6.95855958133856  | 5.83264422129549  |
| O  | 12.88500310605236 | 4.10334157739689  | 6.19346040430785  |
| N  | 13.60345479256289 | 10.00383131012704 | 7.60121494867887  |
| N  | 12.98458193512406 | 7.32173549536625  | 7.70755050178586  |
| C  | 9.50632240673585  | 8.02271212773979  | 2.88214675395380  |
| H  | 8.73504143774201  | 7.76001413602418  | 3.61658819423982  |
| H  | 9.12145218299090  | 7.73624883223933  | 1.88576946884264  |
| N  | 10.73680223974121 | 7.26118121220566  | 3.20068876052809  |
| C  | 12.98329105506941 | 6.68963694585289  | 2.25874439580848  |
| H  | 13.00881004662248 | 5.73048546024626  | 2.80036675143752  |
| H  | 13.51106976852607 | 6.55954744838979  | 1.29811546847731  |
| C  | 13.18397410096554 | 7.23881343419786  | 10.09113018435434 |
| H  | 13.29417274239621 | 7.77672430110018  | 11.03240244755605 |
| C  | 15.62797439366941 | 8.46822648848599  | 4.09001096969641  |
| H  | 15.46357198080404 | 9.41493112298362  | 3.55021114192929  |
| C  | 13.01906233959846 | 5.20216078548781  | 8.83022162682493  |
| H  | 12.98914699093920 | 4.11748210476611  | 8.74733484226334  |
| C  | 14.98915381263777 | 7.33273220300719  | 3.34032251783572  |
| H  | 15.54970526932846 | 7.15945989900086  | 2.40551228266023  |
| H  | 14.99862210759112 | 6.40717941019662  | 3.94016413367006  |
| C  | 15.56614220564206 | 9.72815477822986  | 6.07679486844612  |
| C  | 15.05715476198464 | 9.72974166262135  | 7.49729757953914  |
| H  | 15.25479469973610 | 8.74069028998187  | 7.92890978993405  |
| C  | 12.96338322280772 | 5.97718574336551  | 7.67338360957409  |
| C  | 9.81371750722569  | 8.26884901215284  | 7.86143269379976  |
| C  | 8.80811551928726  | 4.93801473791298  | 5.41192217033517  |
| H  | 8.55742704734030  | 4.13226493656623  | 4.72241353506524  |
| C  | 11.57158854763242 | 7.15483672725666  | 1.98563282613906  |
| H  | 11.62018903144838 | 8.14865283583258  | 1.52166577756836  |
| H  | 11.10235814520261 | 6.47106918020533  | 1.25176460480107  |

|   |                   |                   |                   |
|---|-------------------|-------------------|-------------------|
| C | 12.89948358066207 | 5.35454912405128  | 6.28567694132698  |
| C | 10.36528828058835 | 5.91479634648728  | 3.66945824618696  |
| H | 11.28400334906342 | 5.32044481397796  | 3.76769996309875  |
| H | 9.70842857352400  | 5.40485352507242  | 2.93925151538027  |
| C | 13.10531782903371 | 9.45326324955883  | 8.87277563567909  |
| H | 13.69451095091579 | 9.83210440646573  | 9.72978424314728  |
| H | 12.06617943598699 | 9.78288051353995  | 9.00695132824411  |
| C | 9.69974807844710  | 5.94161224051775  | 5.01942862749108  |
| C | 8.56859738440277  | 6.06376719318246  | 7.52024278666639  |
| H | 8.14211244022375  | 6.16773153733676  | 8.51611663349588  |
| C | 9.69933170234909  | 9.51983252042261  | 2.92849935538774  |
| H | 10.55868035263065 | 9.85314923288081  | 2.32129316575061  |
| H | 8.79174334768998  | 10.01002120412497 | 2.53920497770459  |
| C | 13.12608232607067 | 5.84841980648287  | 10.06074243701529 |
| H | 13.17913372662831 | 5.27465678647225  | 10.98593708647682 |
| C | 13.10098580440975 | 7.94773159600456  | 8.88818655120551  |
| C | 9.45115800868207  | 7.03404824851278  | 7.04916846929872  |
| C | 8.24922531581786  | 4.99340001921339  | 6.68582915693929  |
| H | 7.55801541335118  | 4.21877826588143  | 7.01777281730740  |
| O | 11.52596218268606 | 11.49090288302337 | 6.06980032859473  |
| O | 13.00563169641605 | 10.30258752547324 | 4.02130743638670  |
| C | 9.82037512114605  | 11.34580447777101 | 4.41737985695577  |
| C | 13.38448962252596 | 11.46637358080642 | 7.56887682634795  |
| H | 16.71182708645501 | 8.28572296936450  | 4.18371669676843  |
| H | 15.25801093379119 | 10.62991580578549 | 5.52097634068303  |
| H | 16.66810858598163 | 9.68202358951136  | 6.08642544261471  |
| H | 15.63160690820470 | 10.46561549264887 | 8.09013419403797  |
| C | 10.14129182448908 | 11.75832697137148 | 5.82842874135232  |
| C | 11.94047052478764 | 11.87800120920129 | 7.38276321343568  |
| H | 12.68212990774134 | 11.12197985261606 | 4.43669260991985  |
| H | 8.79795426461929  | 11.67249555343456 | 4.16376866572175  |
| H | 10.52397770780008 | 11.82078214177422 | 3.71180202068970  |
| H | 13.76722469163277 | 11.93228004503382 | 8.49793664300698  |
| H | 13.97085049339744 | 11.87577697608347 | 6.73552596261550  |
| H | 9.52920245416580  | 11.19555357572609 | 6.55164194167354  |
| H | 9.93751936114396  | 12.83681894081649 | 5.94219266933377  |
| H | 11.27593258362640 | 11.40839657579717 | 8.12464910564008  |

### **LaFMacropa**

|    |                   |                  |                   |
|----|-------------------|------------------|-------------------|
| La | 2.38125701045825  | 4.12665783279925 | 10.65267883448133 |
| O  | 3.00081389042236  | 5.41449941088905 | 8.57037142644427  |
| O  | 3.84661104298963  | 7.22435719592947 | 7.52428353031277  |
| O  | -0.01262265553173 | 4.47790134129261 | 9.22062877418849  |
| O  | 2.02768173563235  | 2.81250750997104 | 8.04779906089515  |
| F  | 1.25881918791056  | 2.18894005259087 | 10.65350968114803 |
| N  | 1.94355670027367  | 6.87325787473815 | 10.50837329239322 |
| N  | 4.68854031667931  | 2.83833532507478 | 9.28360377861373  |

|   |                   |                   |                   |
|---|-------------------|-------------------|-------------------|
| C | 3.21571800648985  | 6.66632568277778  | 8.45386062021862  |
| C | 2.61960270882367  | 7.53459070219708  | 9.55180542829571  |
| C | 2.74256368257216  | 8.92250281819813  | 9.54944991635118  |
| H | 3.30874238231360  | 9.40662121598595  | 8.75609652281137  |
| C | 2.11873540809996  | 9.64808286168068  | 10.56316621479723 |
| H | 2.18778537342178  | 10.73546644604570 | 10.59027005416199 |
| C | 7.06982279278101  | 5.68246314472864  | 9.77691270584649  |
| H | 7.79615813986473  | 5.49559110182604  | 8.98636227559181  |
| C | 5.88875961463836  | 4.93491453987684  | 9.82955833134821  |
| C | 5.57398016290288  | 3.90227957338447  | 8.78126221425586  |
| H | 5.05748229505825  | 4.41629659221915  | 7.95917636870775  |
| H | 6.51526632120292  | 3.48112151208101  | 8.37915569092327  |
| C | 5.42700132444448  | 2.01139384724844  | 10.26615217892823 |
| H | 6.08188344873776  | 1.28506202994534  | 9.74983944012405  |
| H | -0.73099318819942 | 6.59288788256975  | 10.44819805012371 |
| C | -1.15699587340931 | 4.54520615540602  | 10.08887065760260 |
| H | -1.26984398432618 | 3.58205704347625  | 10.61549513179121 |
| H | -2.06318682332372 | 4.71335661798633  | 9.48396398928392  |
| C | -0.24019060520640 | 3.52198418877431  | 8.16944303676481  |
| H | -1.10126278779257 | 3.84952569184668  | 7.56353353873016  |
| H | -0.46600017968671 | 2.53896057988166  | 8.61408964242586  |
| C | 0.98026338196072  | 3.42759881384482  | 7.29570514363413  |
| H | 0.73833376863638  | 2.81299068146983  | 6.41101068839520  |
| H | 1.30135114896787  | 4.42776562081169  | 6.95883003113289  |
| C | 3.21258887453980  | 2.63218707538805  | 7.27147899720513  |
| H | 3.54760576917279  | 3.60500786773693  | 6.87685186220305  |
| H | 3.00295128322854  | 1.96467662845982  | 6.41751269411682  |
| C | 4.25239790019587  | 1.98469943584743  | 8.15781609134627  |
| H | 3.82236311706927  | 1.06570108964589  | 8.57684527294588  |
| H | 5.12134496263998  | 1.68881110624851  | 7.53854356744288  |
| O | 1.42121545598878  | 3.16331587474315  | 13.25877911476409 |
| N | 0.11210209809932  | 5.48005575015267  | 12.02285048880257 |
| O | 3.88075761313876  | 2.22881943771810  | 12.08238008441489 |
| O | 3.18560690138581  | 5.30720432964406  | 12.73386429336671 |
| N | 4.97886773982576  | 5.12090607902408  | 10.79722826136496 |
| C | 1.32662699027030  | 7.56864958025508  | 11.47523457184090 |
| C | 1.38598039944477  | 8.96504732276258  | 11.52961297452808 |
| C | 7.29628223580559  | 6.65628752019352  | 10.74535221825258 |
| C | 4.51899483645555  | 1.27236844274559  | 11.21900941027946 |
| H | 6.07445315980318  | 2.66998404457471  | 10.85806976251656 |
| C | -0.97451339406895 | 5.70238454574891  | 11.04074867944942 |
| C | 2.47859800356020  | 2.56395054891039  | 14.00936596204602 |
| C | 0.67529758866462  | 4.10100915259717  | 14.03543547933079 |
| C | -0.40714068350669 | 4.67671261657580  | 13.15053041567495 |
| C | 0.58838070223968  | 6.78040950547244  | 12.52298118398596 |
| C | 3.16912482135704  | 1.55369892507019  | 13.13509700974455 |
| C | 4.16544620605735  | 6.11470194252450  | 12.85461904305327 |
| C | 5.21552752314756  | 6.03344750285438  | 11.75665999308254 |

|   |                   |                  |                   |
|---|-------------------|------------------|-------------------|
| H | 0.86032129784224  | 9.50056477894571 | 12.31977823123569 |
| C | 6.35778101359546  | 6.83143017774657 | 11.76116401538404 |
| H | 8.20478084252756  | 7.25790405599652 | 10.71972081655370 |
| H | 3.74648267262090  | 0.68523494271448 | 10.69337632905642 |
| H | 5.12144547377876  | 0.57816505731801 | 11.82768858121920 |
| H | -1.93119492993016 | 5.90382107340009 | 11.55757084193867 |
| H | 2.06881003373372  | 2.04778845536429 | 14.89516406805234 |
| H | 3.18516583280428  | 3.34208598708234 | 14.34446430651515 |
| H | 0.20379461170096  | 3.58744353925601 | 14.89144962759477 |
| H | 1.35184404114437  | 4.87772797113665 | 14.42697143633072 |
| H | -0.98863602584798 | 3.84422547813349 | 12.73348496976667 |
| H | -1.09686111638507 | 5.28200892654491 | 13.77018544868325 |
| H | -0.24815443609051 | 7.38475246294766 | 12.92301681408159 |
| H | 1.29077663080476  | 6.59243554345998 | 13.34647908391560 |
| H | 2.43043432846119  | 0.86545445023160 | 12.69257842457495 |
| H | 3.88498377875296  | 0.97299293976086 | 13.74021774937030 |
| O | 4.33651303191057  | 6.93465016208136 | 13.78844475619429 |
| H | 6.49605906625461  | 7.56082478543767 | 12.55689681705098 |

### 2.3 X-ray crystallography

**Table S4.** X-ray crystallographic data collection and refinement parameters for complexes **5**, **6** and **8**.

|                            | [LaF(macropa)]<br>( <b>5</b> )                                                 | 2[La(H <sub>2</sub> O)(macropa)]OTf<br>( <b>6</b> )                                                             | [LaF(DOTpy)]OTf <sub>2</sub><br>( <b>8</b> )                                                 |
|----------------------------|--------------------------------------------------------------------------------|-----------------------------------------------------------------------------------------------------------------|----------------------------------------------------------------------------------------------|
| Chemical formula           | C <sub>26</sub> H <sub>34</sub> FLa <sub>4</sub> N <sub>4</sub> O <sub>8</sub> | C <sub>60</sub> H <sub>101</sub> ClF <sub>6</sub> La <sub>2</sub> N <sub>9</sub> O <sub>31</sub> S <sub>2</sub> | C <sub>34</sub> H <sub>40</sub> F <sub>7</sub> La <sub>8</sub> O <sub>6</sub> S <sub>2</sub> |
| Formula weight             | 688.48                                                                         | 1935.89                                                                                                         | 992.77                                                                                       |
| Space group symbol a,<br>Å | P 31 2 1                                                                       | P 21                                                                                                            | P 21 21 2                                                                                    |
| b, Å c,<br>Å               | 15.4947(1)                                                                     | 16.7514(3)                                                                                                      | 22.1793(2)                                                                                   |
| α, deg β,<br>deg γ,<br>deg | 15.4947(1)                                                                     | 10.1970(2)                                                                                                      | 11.1061(1)                                                                                   |
| v, Å <sup>3</sup>          | 10.6535(1)                                                                     | 23.4460(5)                                                                                                      | 8.0043(1)                                                                                    |
| Z                          | 90                                                                             | 90                                                                                                              | 90                                                                                           |
| R(reflections)             | 90                                                                             | 96.158(2)                                                                                                       | 90                                                                                           |
| wR2(reflections)           | 120                                                                            | 90                                                                                                              | 90                                                                                           |
| GOF(S)                     | 2215.08(4)                                                                     | 3981.80(14)                                                                                                     | 1971.66(4)                                                                                   |
|                            | 3                                                                              | 2                                                                                                               | 2                                                                                            |
|                            | 0.0249(2925)                                                                   | 0.0186(6237)                                                                                                    | 0.0402(3873)                                                                                 |
|                            | 0.0645(2953)                                                                   | 0.0488(6375)                                                                                                    | 0.1005(3946)                                                                                 |
|                            | 1.083                                                                          | 1.041                                                                                                           | 1.081                                                                                        |

**Table S5.** La–X bond length (Å) for complexes **5**, **6** and **8**.

| [LaF(macropa)]<br>( <b>5</b> ) | [La(H <sub>2</sub> O)(macropa)]OTf<br>( <b>6</b> ) | [LaF(DOTpy)]OTf <sub>2</sub><br>( <b>8</b> ) |
|--------------------------------|----------------------------------------------------|----------------------------------------------|
|--------------------------------|----------------------------------------------------|----------------------------------------------|

|                     |          |        |          |
|---------------------|----------|--------|----------|
| La–X bond length, Å | 2.286(5) | 2.4882 | 2.256(5) |
|---------------------|----------|--------|----------|

### 3 References:

1. L. S. Natrajan, N. M. Khoabane, B. L. Dadds, C. A. Muryn, R. G. Pritchard, S. L. Heath, A. M. Kenwright, I. Kuprov and S. Faulkner, *Inorganic Chemistry*, 2010, 49, 7700–7709.
